# Supplementary material for: Gradient Boosted Machine Learning Model to Predict H2, CH4, and CO2 Uptake in Metal–Organic Frameworks Using Experimental Data
Source: PubMed Central journal article supplement (PMC10428209; doi:10.1021/acs.jcim.3c00135), 2023-07-18
Supplement: ci3c00135_si_001.pdf [file ci3c00135_si_001.pdf]

# Supporting Information

Gradient boosted machine learning model to predict H<sub>2</sub>, CH<sub>4</sub> and CO<sub>2</sub> uptake in metal organic frameworks using experimental data

Tom Bailey,<sup>1</sup> Adam Jackson,<sup>1</sup> Razvan-Antonio Berbece,<sup>1</sup> Kejun Wu,<sup>\*1,2</sup> Nicole Hondow,<sup>\*1</sup> and Elaine Martin<sup>\*1</sup>

1. School of Chemical and Process Engineering, University of Leeds, Leeds LS2 9JT UK
2. Zhejiang Provincial Key Laboratory of Advanced Chemical Engineering Manufacture Technology, College of Chemical and Biological Engineering, Zhejiang University, Hangzhou, China, 310027

Email Addresses for Corresponding Authors:

Kejun Wu: [k.j.wu@leeds.ac.uk](mailto:k.j.wu@leeds.ac.uk)

Nicole Hondow: [n.hondow@leeds.ac.uk](mailto:n.hondow@leeds.ac.uk)

Elaine Martin: [e.martin@leeds.ac.uk](mailto:e.martin@leeds.ac.uk)

Table S1: MOF structures with literature H<sub>2</sub> uptakes

| MOF Name                                                                                                              | Common Name | Pressure (Bar) | Temperature (K) | Uptake (% wt) | Reference                                    |
|-----------------------------------------------------------------------------------------------------------------------|-------------|----------------|-----------------|---------------|----------------------------------------------|
| Be <sub>12</sub> (OH) <sub>12</sub> (BTB) <sub>4</sub>                                                                |             | 1              | 77              | 1.6           | Sumida et al., 2009 <sup>1</sup>             |
|                                                                                                                       |             | 20             | 77              | 6             |                                              |
|                                                                                                                       |             | 100            | 77              | 9.2           |                                              |
|                                                                                                                       |             | 95             | 298             | 2.3           |                                              |
| Cd <sub>4</sub> (TCPM) <sub>2</sub>                                                                                   |             | 1              | 77              | 2.8           | Chun et al., 2004 <sup>2</sup>               |
| Co(BDP)                                                                                                               |             | 30             | 77              | 3.1           | Jin Choi, Dincă and Long, 2008 <sup>3</sup>  |
| Co(BTC)(4,4'-bpy)                                                                                                     |             | 72             | 77              | 2.05          | Li.Y et al., 2008 <sup>4</sup>               |
| Co <sub>2</sub> (BDC) <sub>2</sub> (dabco)                                                                            |             | 44.2           | 77              | 4.11          | Suh et al, 2012 <sup>5</sup>                 |
| Co <sub>3</sub> (bpdc) <sub>3</sub> (4,4'-bpy)                                                                        |             | 1              | 77              | 1.98          | Lee et al., 2005 <sup>6</sup>                |
| Co <sub>3</sub> (NDC) <sub>3</sub> (dabco)                                                                            |             | 1              | 77              | 2.45          | Chun et al., 2008 <sup>7</sup>               |
| Co <sub>3</sub> [(Co <sub>4</sub> Cl) <sub>3</sub> (BTT) <sub>8</sub> (H <sub>2</sub> O) <sub>12</sub> ] <sub>2</sub> |             | 1              | 77              | 1.8           | Liao et al., 2013 <sup>8</sup>               |
| Cr <sub>3</sub> (BTC) <sub>2</sub>                                                                                    |             | 1              | 77              | 1.9           | Sumida, Her, et al., 2011 <sup>9</sup>       |
| Cu(dccptp)(NO <sub>3</sub> )                                                                                          |             | 20             | 77              | 1.91          | Yang et al., 2008 <sup>10</sup>              |
| Cu(peip)                                                                                                              |             | 1              | 77              | 2.51          | Liu, Oh and Soo Lah, 2011 <sup>11</sup>      |
|                                                                                                                       |             | 40             | 77              | 4.14          |                                              |
| Cu(pmip)                                                                                                              |             | 1              | 77              | 2.36          | Liu, Oh and Soo Lah, 2011 <sup>11</sup>      |
| Cu(TZI) <sub>3</sub>                                                                                                  |             | 1              | 77              | 2.4           | Nouar et al., 2008 <sup>12</sup>             |
| Cu <sub>2</sub> (BDC) <sub>2</sub> (dabco)                                                                            |             | 1              | 77              | 1.8           | Lee et al., 2007 <sup>13</sup>               |
|                                                                                                                       |             | 33.7           | 77              | 2.7           |                                              |
| Cu <sub>2</sub> (BDDC)                                                                                                |             | 0.95           | 77              | 1.64          | Bing Zheng et al., 2010 <sup>14</sup>        |
|                                                                                                                       |             | 17             | 77              | 3.98          |                                              |
| Cu <sub>2</sub> (dhtp)                                                                                                | Cu-MOF-74   | 5              | 77              | 2.22          | García-Holley et al., 2018 <sup>15</sup>     |
|                                                                                                                       |             | 100            | 77              | 3.15          |                                              |
|                                                                                                                       |             | 100            | 160             | 2.87          |                                              |
| Cu <sub>2</sub> (DAIA)(H <sub>2</sub> O) <sub>2</sub>                                                                 | Cu-MOPF     | 1              | 77              | 2.8           | Maity, Karan and Biradha, 2018 <sup>16</sup> |
| Al(OH)(SDC)                                                                                                           | CYCU-3-Al   | 5              | 77              | 3.37          | García-Holley et al., 2018 <sup>15</sup>     |

|                                                                                      |                |      |     |      |                                                 |
|--------------------------------------------------------------------------------------|----------------|------|-----|------|-------------------------------------------------|
|                                                                                      |                | 100  | 77  | 8.24 |                                                 |
|                                                                                      |                | 100  | 160 | 7.92 |                                                 |
| Fe <sub>3</sub> (OH)(pbpc) <sub>2</sub>                                              |                | 1    | 77  | 1.6  | Jia et al., 2007 <sup>17</sup>                  |
|                                                                                      |                | 20   | 77  | 3.05 |                                                 |
| Fe <sub>4</sub> O <sub>2</sub> (BTB) <sub>8/3</sub>                                  |                | 1    | 77  | 2.1  | Choi et al., 2007 <sup>18</sup>                 |
| Zn <sub>6</sub> (BTB) <sub>4</sub> (4,4'-bpy) <sub>3</sub>                           | FJI-1          | 37   | 77  | 6.52 | Han et al., 2011 <sup>19</sup>                  |
| HCu[(Cu <sub>4</sub> Cl) <sub>3</sub> (BTT) <sub>8</sub> ]                           | Cu-BTT         | 1.2  | 77  | 2.42 | Dincă et al., 2007 <sup>20</sup>                |
|                                                                                      |                | 20   | 77  | 4.1  |                                                 |
| Cu <sub>3</sub> (BTC) <sub>2</sub>                                                   | HKUST-1        | 5    | 77  | 3.53 | García-Holley et al., 2018 <sup>15</sup>        |
|                                                                                      |                | 100  | 77  | 5.31 |                                                 |
|                                                                                      |                | 100  | 160 | 4.91 |                                                 |
| Zn <sub>4</sub> O(CH <sub>3</sub> PhTDC) <sub>3</sub>                                | IFMC-29        | 1    | 77  | 1.75 | Cheng et al., 2018 <sup>21</sup>                |
| Zn <sub>4</sub> O(dobdc) <sub>2</sub>                                                | IRMOF-6        | 45   | 77  | 4.63 | Wong-Foy, Matzger and Yaghi, 2006 <sup>22</sup> |
| Zn <sub>4</sub> O(NDC) <sub>3</sub>                                                  | IRMOF-8        | 1    | 77  | 1.5  | Rowsell et al., 2004 <sup>23</sup>              |
| Zn <sub>4</sub> O(HPDC) <sub>2</sub>                                                 | IRMOF-11       | 1    | 77  | 1.62 | Rowsell et al., 2004 <sup>23</sup>              |
|                                                                                      |                | 33.7 | 77  | 3.4  | Wong-Foy, Matzger and Yaghi, 2006 <sup>22</sup> |
| Zn <sub>4</sub> O(pyrdc) <sub>2</sub>                                                | IRMOF-13       | 1    | 77  | 1.73 | Rowsell and Yaghi, 2006 <sup>24</sup>           |
| Zn <sub>4</sub> O(ttdc) <sub>2</sub>                                                 | IRMOF-20       | 77.6 | 77  | 6.25 | Wong-Foy, Matzger and Yaghi, 2006 <sup>22</sup> |
| Cd <sub>3</sub> (bpdc) <sub>3</sub>                                                  | JUC-48         | 40   | 77  | 2.8  | Fang et al., 2007 <sup>25</sup>                 |
| Cu <sub>3</sub> (BTAT)                                                               | MFM-132a       | 1    | 77  | 2.83 | Yan et al., 2018 <sup>26</sup>                  |
|                                                                                      |                | 20   | 77  | 6.3  |                                                 |
| Mg <sub>2</sub> (dobdc)                                                              | Mg-MOF-74      | 1    | 77  | 2.2  | Sumida, Brown, et al., 2011 <sup>27</sup>       |
|                                                                                      |                | 100  | 77  | 4.9  |                                                 |
| Al(OH)(bdc)                                                                          | MIL-53(Al)     | 16   | 77  | 3.8  | Férey et al., 2003 <sup>28</sup>                |
| Cr(OH)(bdc)                                                                          | MIL-53(Cr)     | 16   | 77  | 3.1  | Férey et al., 2003 <sup>28</sup>                |
| Cr <sub>3</sub> OF(BTC) <sub>2</sub>                                                 | MIL-100        | 26.5 | 77  | 3.28 | Latroche et al., 2006 <sup>29</sup>             |
| Cr <sub>3</sub> O(BDC) <sub>2</sub>                                                  | MIL-101(Cr)    | 1    | 77  | 1.92 | Ren et al., 2014 <sup>30</sup>                  |
| Mn <sub>3</sub> [(Mn <sub>4</sub> Cl) <sub>3</sub> (BTT) <sub>8</sub> ] <sub>2</sub> | Mn(BTT)        | 1.2  | 77  | 2.2  | Dincă et al., 2007 <sup>20</sup>                |
|                                                                                      |                | 90   | 77  | 6.9  |                                                 |
| Zn <sub>4</sub> O(bdc) <sub>3</sub>                                                  | MOF-5, IRMOF-1 | 50   | 77  | 4.7  | Panella et al., 2006 <sup>31</sup>              |

|                                                                                                                       |                      |    |    |      |                                                 |
|-----------------------------------------------------------------------------------------------------------------------|----------------------|----|----|------|-------------------------------------------------|
| Pd(bdc)                                                                                                               | MOF-5 (Pd)           | 1  | 77 | 1.86 | Sabo et al., 2007 <sup>32</sup>                 |
| Zn <sub>2</sub> (dhtp)                                                                                                | Zn-MOF-74, CPO-27-Zn | 1  | 77 | 1.77 | Rowsell and Yaghi, 2006 <sup>24</sup>           |
|                                                                                                                       |                      | 30 | 77 | 2.8  | Liu et al., 2008 <sup>33</sup>                  |
|                                                                                                                       |                      | 70 | 77 | 7.5  | Wong-Foy, Matzger and Yaghi, 2006 <sup>22</sup> |
| Zn <sub>4</sub> O(BBC) <sub>2</sub> (H <sub>2</sub> O) <sub>3</sub>                                                   | MOF-200              | 80 | 77 | 7.4  | Furukawa et al., 2010 <sup>34</sup>             |
| Zn <sub>4</sub> O(BTB) <sub>4/3</sub> (NDC)                                                                           | MOF-205              | 80 | 77 | 7    | Furukawa et al., 2010 <sup>34</sup>             |
| Zn <sub>4</sub> O(BTE) <sub>4/3</sub> (bpdc)                                                                          | MOF-210              | 80 | 77 | 8.6  | Furukawa et al., 2010 <sup>34</sup>             |
| Cu <sub>2</sub> (bptc)                                                                                                | MOF-505, NOTT-100    | 1  | 77 | 2.47 | Chen et al., 2005 <sup>35</sup>                 |
|                                                                                                                       |                      | 20 | 77 | 4.02 | Lin et al., 2009 <sup>36</sup>                  |
| Zn <sub>4</sub> O(AZD) <sub>3</sub>                                                                                   | MOF-646              | 1  | 77 | 1.75 | Barman et al., 2010 <sup>37</sup>               |
|                                                                                                                       | MOF-808              | 1  | 77 | 2.78 | Xia et al., 2016 <sup>38</sup>                  |
| Ni(dhtp) <sub>2</sub>                                                                                                 | Ni-MOF-74            | 70 | 77 | 1.8  | Dietzel et al., 2006 <sup>39</sup>              |
| Ni(BTC) <sub>4</sub> (4,4'-bpy)                                                                                       |                      | 72 | 77 | 3.42 | Y. Li et al., 2008 <sup>4</sup>                 |
| Ni <sub>3</sub> (OH)(pbpc) <sub>3</sub>                                                                               |                      | 1  | 77 | 1.99 | Jia et al., 2007 <sup>17</sup>                  |
|                                                                                                                       |                      | 20 | 77 | 4.15 |                                                 |
| Ni <sub>3</sub> [(Co <sub>4</sub> Cl) <sub>3</sub> (BTT) <sub>8</sub> (H <sub>2</sub> O) <sub>12</sub> ] <sub>2</sub> |                      | 1  | 77 | 1.5  | Liao et al., 2013 <sup>8</sup>                  |
| NJU-bai12-ac                                                                                                          |                      | 1  | 77 | 1.91 | Zheng et al., 2013 <sup>40</sup>                |
|                                                                                                                       |                      | 20 | 77 | 5.9  |                                                 |
| Cu <sub>2</sub> (tptc)                                                                                                | NOTT-101             | 1  | 77 | 2.52 | Lin et al., 2009 <sup>36</sup>                  |
|                                                                                                                       |                      | 20 | 77 | 6.06 |                                                 |
|                                                                                                                       |                      | 60 | 77 | 6.6  |                                                 |
| Cu <sub>2</sub> (qptc)                                                                                                | NOTT-102             | 1  | 77 | 2.24 | Lin et al., 2009 <sup>36</sup>                  |
|                                                                                                                       |                      | 20 | 77 | 6.07 |                                                 |
|                                                                                                                       |                      | 60 | 77 | 7.2  |                                                 |
| Cu <sub>2</sub> (NddIP)                                                                                               | NOTT-103             | 1  | 77 | 2.63 | Lin et al., 2009 <sup>36</sup>                  |
|                                                                                                                       |                      | 20 | 77 | 6.51 |                                                 |
|                                                                                                                       |                      | 60 | 77 | 7.78 |                                                 |
| Cu <sub>2</sub> (DFTP)                                                                                                | NOTT-105             | 1  | 77 | 2.52 | Lin et al., 2009 <sup>36</sup>                  |

|                                         |                  |      |     |      |                                          |
|-----------------------------------------|------------------|------|-----|------|------------------------------------------|
|                                         |                  | 20   | 77  | 5.4  |                                          |
| Cu <sub>2</sub> (DMTP)                  | NOTT-106         | 1    | 77  | 2.29 | Lin et al, 2009 <sup>36</sup>            |
|                                         |                  | 20   | 77  | 4.5  |                                          |
| Cu <sub>2</sub> (TMTP)                  | NOTT-107         | 1    | 77  | 2.26 | Lin et al, 2009 <sup>36</sup>            |
|                                         |                  | 20   | 77  | 4.46 |                                          |
| Cu <sub>2</sub> (ndip)                  | NOTT-109         | 1    | 77  | 2.33 | Lin et al, 2009 <sup>36</sup>            |
|                                         |                  | 20   | 77  | 4.15 |                                          |
| Cu <sub>2</sub> (pdip)                  | NOTT-110         | 1    | 77  | 2.64 | Yang et al., 2009 <sup>41</sup>          |
|                                         |                  | 20   | 77  | 6.59 |                                          |
|                                         |                  | 55   | 77  | 7.62 |                                          |
| Cu <sub>2</sub> (dpdip)                 | NOTT-111         | 1    | 77  | 2.56 | Yang et al., 2009 <sup>41</sup>          |
|                                         |                  | 20   | 77  | 6.48 |                                          |
|                                         |                  | 48   | 77  | 7.36 |                                          |
| Cu <sub>3</sub> (BDDC)                  | NOTT-112         | 1    | 78  | 2.3  | Yan et al., 2009 <sup>42</sup>           |
|                                         |                  | 37.5 | 77  | 7.07 |                                          |
|                                         |                  | 100  | 77  | 8.74 | García-Holley et al., 2018 <sup>15</sup> |
|                                         |                  | 100  | 160 | 8.31 |                                          |
| Cu <sub>3</sub> (tbtt)                  | NOTT-113         | 1    | 78  | 2.39 | Yan, Blake, et al., 2011 <sup>43</sup>   |
|                                         |                  | 30   | 78  | 5.1  |                                          |
| Cu <sub>3</sub> (abtt)                  | NOTT-114         | 1    | 78  | 2.39 | Yan, Blake, et al., 2011 <sup>43</sup>   |
|                                         |                  | 30   | 78  | 5    |                                          |
| Cu <sub>3</sub> (NTBD)                  | NOTT-115         | 1    | 78  | 2.39 | Yan, Blake, et al., 2011 <sup>43</sup>   |
|                                         |                  | 33   | 78  | 5.6  |                                          |
| Cu <sub>3</sub> (btti)                  | NOTT-119, PCN-69 | 1    | 77  | 1.44 | Yan, Yang, et al., 2011 <sup>44</sup>    |
|                                         |                  | 44   | 77  | 5.6  |                                          |
| Cu <sub>4</sub> (TDTM)                  | NOTT-140         | 1    | 77  | 2.5  | Tan.C et al., 2011 <sup>45</sup>         |
|                                         |                  | 20   | 77  | 6    |                                          |
| Sc <sub>2</sub> (bptc)(OH) <sub>2</sub> | NOTT-400         | 1    | 77  | 2.14 | Ibarra et al., 2011 <sup>46</sup>        |
|                                         |                  | 20   | 77  | 3.84 |                                          |
| Sc(TDA)(OH)                             | NOTT-401         | 1    | 77  | 2.31 | Ibarra et al., 2011 <sup>46</sup>        |

|                                                 |                  |     |     |      |                                                     |
|-------------------------------------------------|------------------|-----|-----|------|-----------------------------------------------------|
|                                                 |                  | 20  | 77  | 4.44 |                                                     |
| Cu <sub>3</sub> (ttei)                          | NU-100           | 1   | 77  | 1.82 | Farha et al., 2010 <sup>47</sup>                    |
|                                                 |                  | 56  | 77  | 9.95 |                                                     |
| Cu <sub>3</sub> (TIPTB)                         | NU-125, NOTT-122 | 1   | 77  | 2.61 | Yan et al., 2014 <sup>48</sup>                      |
|                                                 |                  | 5   | 77  | 4.6  | García-Holley et al., 2018 <sup>15</sup>            |
|                                                 |                  | 100 | 77  | 8.2  |                                                     |
|                                                 |                  | 100 | 160 | 7.76 |                                                     |
| Zr(TBAPy) <sub>2</sub>                          | NU-1000          | 5   | 77  | 3.37 | García-Holley et al., 2018 <sup>15</sup>            |
|                                                 |                  | 100 | 77  | 7.98 |                                                     |
|                                                 |                  | 100 | 160 | 7.62 |                                                     |
| Zr(Py-XP)                                       | NU-1101          | 100 | 77  | 9.5  | Gómez-Gualdrón et al., 2017 <sup>49</sup>           |
| Zr(Por-PP)                                      | NU-1102          | 100 | 77  | 9.9  | Gómez-Gualdrón et al., 2017 <sup>49</sup>           |
| Zr(Py-PTP)                                      | NU-1103          | 100 | 77  | 13   | Gómez-Gualdrón et al., 2017 <sup>49</sup>           |
| Cu <sub>3</sub> (TATB) <sub>2</sub> (catenated) | PCN-6            | 1   | 77  | 1.9  | Sun, Ma, et al., 2006 <sup>50</sup>                 |
|                                                 |                  | 50  | 77  | 7.2  | S. Ma et al., 2008 <sup>51</sup>                    |
| Cu <sub>2</sub> (aobtc)                         | PCN-10           | 1   | 77  | 2.34 | X.-S. Wang, Ma, Rauch, et al., 2008 <sup>52</sup>   |
|                                                 |                  | 3.5 | 30  | 6.84 |                                                     |
|                                                 |                  | 45  | 77  | 5.23 |                                                     |
| Cu <sub>2</sub> (sbtc)                          | PCN-11           | 1   | 77  | 2.55 | X.-S. Wang, Ma, Rauch, et al., 2008 <sup>49</sup>   |
|                                                 |                  | 3.5 | 30  | 7.89 |                                                     |
|                                                 |                  | 45  | 77  | 5.97 |                                                     |
| Cu <sub>2</sub> (mdip)                          | PCN-12           | 1   | 77  | 3.05 | X.-S. Wang, Ma, Forster, et al., 2008 <sup>49</sup> |
| Cu <sub>2</sub> (adip)                          | PCN-14           | 1   | 77  | 2.7  | Ma et al., 2009 <sup>53</sup>                       |
|                                                 |                  | 45  | 77  | 4.42 |                                                     |
| Cu <sub>2</sub> (ebdc)                          | PCN-16           | 1   | 77  | 2.6  | Sun et al., 2010 <sup>54</sup>                      |
|                                                 |                  | 45  | 77  | 5.1  |                                                     |
| Cu <sub>2</sub> (PMTB)                          | PCN-21           | 1   | 77  | 1.6  | Zhuang et al., 2010 <sup>55</sup>                   |
| Cu <sub>2</sub> (bdi)                           | PCN-46           | 1   | 77  | 1.95 | Zhao et al., 2010 <sup>56</sup>                     |
|                                                 |                  | 32  | 77  | 5.31 |                                                     |

|                                                         |                  |     |     |      |                                                        |
|---------------------------------------------------------|------------------|-----|-----|------|--------------------------------------------------------|
| Cu <sub>3</sub> (btei)                                  | PCN-61           | 1   | 77  | 2.25 | Yuan et al., 2010 <sup>57</sup>                        |
|                                                         |                  | 33  | 77  | 6.24 |                                                        |
| Cu <sub>3</sub> (ntei)                                  | PCN-66           | 1   | 77  | 1.79 | Yuan et al., 2010 <sup>57</sup>                        |
|                                                         |                  | 45  | 77  | 6.65 |                                                        |
| Cu <sub>3</sub> (ptei)                                  | PCN-68, NOTT-116 | 1   | 77  | 1.87 | Yuan et al., 2010 <sup>57</sup>                        |
|                                                         |                  | 50  | 77  | 7.32 |                                                        |
| Fe <sub>2</sub> (abtc)                                  | PCN-250          | 5   | 77  | 3.77 | García-Holley et al., 2018 <sup>15</sup>               |
|                                                         |                  | 100 | 77  | 5.37 |                                                        |
|                                                         |                  | 100 | 160 | 4.93 |                                                        |
| Cu <sub>2</sub> (bdpb)                                  | PMOF-3           | 1   | 77  | 2.47 | Zhang et al., 2011 <sup>58</sup>                       |
| Cu <sub>3</sub> (TDPAT)                                 | rht-MOF-7        | 5   | 77  | 3.23 | García-Holley et al., 2018 <sup>15</sup>               |
|                                                         |                  | 100 | 77  | 4.89 |                                                        |
|                                                         |                  | 100 | 160 | 4.5  |                                                        |
| Sc(BDC) <sub>3</sub>                                    |                  | 1   | 77  | 1.5  | Perles et al., 2005 <sup>59</sup>                      |
| Zn <sub>4</sub> O(NTB) <sub>2</sub>                     | SNU-1            | 1   | 77  | 1.9  | Young Lee, Yeon Jang and Paik Suh., 2005 <sup>60</sup> |
| Zn <sub>2</sub> (abtc)(DMF) <sub>2</sub>                | SNU-4            | 1   | 77  | 2.07 | Lee et al., 2008 <sup>61</sup>                         |
|                                                         |                  | 50  | 77  | 3.7  |                                                        |
| Cu <sub>2</sub> (abtc)(DMF) <sub>2</sub>                | SNU-5'           | 1   | 77  | 1.83 | Lee et al., 2008 <sup>61</sup>                         |
|                                                         |                  | 50  | 77  | 5.22 |                                                        |
| Cu <sub>2</sub> (BPnDC) <sub>2</sub> (4,4'-bpy)         | SNU-6            | 1   | 77  | 1.68 | Park and Suh., 2008 <sup>62</sup>                      |
|                                                         |                  | 70  | 77  | 4.87 |                                                        |
| Cu <sub>2</sub> (TCM)                                   | SNU-21S          | 1   | 77  | 1.95 | Kim and Suh., 2011 <sup>63</sup>                       |
|                                                         |                  | 70  | 77  | 4.37 |                                                        |
| Zn <sub>2</sub> (TCPBDA)(H <sub>2</sub> O) <sub>2</sub> | SNU-30           | 61  | 77  | 3.27 | Park, Cheon and Suh, 2010 <sup>62</sup>                |
| Cu <sub>2</sub> (bdcppi)                                | SNU-50'          | 1   | 77  | 2.1  | Prasad, Hong and Suh, 2010 <sup>64</sup>               |
|                                                         |                  | 1   | 87  | 1.39 |                                                        |
|                                                         |                  | 60  | 77  | 5.53 |                                                        |
| Zn <sub>4</sub> O(CVB) <sub>3</sub>                     | SNU-70           | 20  | 77  | 7    | Ahmed et al., 2019 <sup>65</sup>                       |
|                                                         |                  | 100 | 77  | 10.5 |                                                        |

|                                                             |            |      |     |      |                                                 |
|-------------------------------------------------------------|------------|------|-----|------|-------------------------------------------------|
| Zn <sub>4</sub> O(TCBPA) <sub>2</sub>                       | SNU-77H    | 1    | 77  | 1.79 | Park H. J. et al., 2011 <sup>66</sup>           |
|                                                             |            | 90   | 77  | 8.1  |                                                 |
| Mo <sub>3</sub> (BTC) <sub>2</sub>                          | TUDMOF-1   | 1    | 77  | 1.75 | Kramer, Schwarz and Kaskel, 2006 <sup>67</sup>  |
| Zr(BPDC) <sub>2</sub>                                       | UiO-67     | 5    | 77  | 3.23 | García-Holley et al., 2018 <sup>15</sup>        |
|                                                             |            | 100  | 77  | 5.86 |                                                 |
|                                                             |            | 100  | 160 | 5.53 |                                                 |
| Zr(ACDB) <sub>2</sub>                                       | UiO-68-Ant | 5    | 77  | 3.81 | García-Holley et al., 2018 <sup>15</sup>        |
|                                                             |            | 100  | 77  | 7.58 |                                                 |
|                                                             |            | 100  | 160 | 7.18 |                                                 |
| Zn <sub>4</sub> O(T <sub>2</sub> DC)(BTB) <sub>4/3</sub>    | UMCM-2     | 46   | 77  | 6.9  | Koh, Wong-Foy and Matzger, 2009 <sup>68</sup>   |
| Zn <sub>4</sub> O(bpdc) <sub>1.5</sub> (NDC) <sub>1.5</sub> | UMCM-9     | 20   | 77  | 7.5  | Ahmed et al., 2019 <sup>65</sup>                |
|                                                             |            | 100  | 77  | 11.5 |                                                 |
| Cu <sub>3</sub> (BHB)                                       | UTSA-20    | 1    | 77  | 2.9  | Guo et al., 2011 <sup>69</sup>                  |
|                                                             |            | 15   | 77  | 4.1  |                                                 |
| Cu <sub>3</sub> (bhtc) <sub>2</sub>                         | UMCM-150   | 1    | 77  | 2.1  | Wong-Foy, Lebel and Matzger, 2007 <sup>70</sup> |
|                                                             |            | 45   | 77  | 5.7  |                                                 |
| Y(BTC)                                                      |            | 1    | 77  | 1.57 | Luo et al., 2008 <sup>71</sup>                  |
|                                                             |            | 10   | 77  | 2.1  |                                                 |
| Zn(MeIM) <sub>2</sub>                                       | ZIF-8      | 55   | 77  | 3.01 | Zhou et al., 2007 <sup>72</sup>                 |
|                                                             |            | 30   | 77  | 3.3  |                                                 |
| Co(MeIM) <sub>2</sub>                                       | ZIF-67     | 1    | 77  | 1.53 | Panchariya et al., 2018 <sup>73</sup>           |
| Zn(NDC)(bpe) <sub>0.5</sub>                                 |            | 40   | 77  | 2    | Chen, Ma, et al., 2006 <sup>74</sup>            |
| Zn(peip)                                                    |            | 1    | 77  | 2.27 | Liu, Oh and Soo Lah, 2011b <sup>75</sup>        |
| Zn <sub>2</sub> (BDC)(tmbdc)(dabco)                         |            | 1    | 77  | 2.08 | Chun et al., 2005 <sup>76</sup>                 |
| Zn <sub>2</sub> (BDC) <sub>2</sub> (dabco)                  |            | 1    | 77  | 2.1  | Lee et al., 2007 <sup>13</sup>                  |
|                                                             |            | 83.2 | 77  | 3.17 | Takei et al., 2008 <sup>77</sup>                |
| Zn <sub>2</sub> (btatb)                                     |            | 1    | 77  | 2.2  | Farha et al., 2008 <sup>78</sup>                |
| Zn <sub>2</sub> (NDC) <sub>2</sub> (dabco)                  |            | 1    | 77  | 1.7  | Chun et al., 2005 <sup>76</sup>                 |
| Zn <sub>2</sub> (tftpa) <sub>2</sub> (dabco)                |            | 1    | 77  | 1.78 | Chun et al., 2005 <sup>76</sup>                 |
| Zn <sub>2</sub> (tmbdc) <sub>2</sub> (4,4'-bpy)             |            | 1    | 77  | 1.68 | Chun et al., 2005 <sup>76</sup>                 |



|                                                |        |   |    |      |                                    |
|------------------------------------------------|--------|---|----|------|------------------------------------|
| Zn <sub>2</sub> (tmbdc) <sub>2</sub> (dabco)   |        | 1 | 77 | 1.85 | Chun et al., 2005 <sup>76</sup>    |
| Zn <sub>3</sub> (bpdc) <sub>3</sub> (4,4'-bpy) |        | 1 | 77 | 1.74 | Lee et al., 2005 <sup>79</sup>     |
| Zn(5-AT) <sub>2</sub>                          | ZTF-1  | 1 | 77 | 1.6  | Panda et al., 2011 <sup>80</sup>   |
| Zn(Mlai)                                       | IMOF-3 | 1 | 77 | 1.5  | Debatin et al., 2010 <sup>81</sup> |

Table S2: MOF structures with literature CH<sub>4</sub> uptakes

| MOF Name                                                                | Common Name | Pressure (Bar) | Temperature (K) | Uptake (% wt) | Reference                                        |
|-------------------------------------------------------------------------|-------------|----------------|-----------------|---------------|--------------------------------------------------|
| Al <sub>3</sub> (TCPT) <sub>6</sub>                                     | Alsoc-MOF-1 | 65             | 270             | 33.8          | Alezi et al., 2015 <sup>82</sup>                 |
|                                                                         |             | 65             | 270             | 29            |                                                  |
| Cd(bpydb)                                                               |             | 35             | 298             | 5.5           | Sharma et al., 2011 <sup>83</sup>                |
| Co <sub>2</sub> (4,4'-bpy) <sub>3</sub> (NO <sub>3</sub> ) <sub>4</sub> |             | 30             | 298             | 3.56          | Kondo et al., 1997 <sup>84</sup>                 |
| Co <sub>2</sub> (azpy) <sub>3</sub> (NO <sub>3</sub> ) <sub>4</sub>     |             | 36             | 298             | 2.9           | Kondo et al., 2000 <sup>85</sup>                 |
| Co <sub>2</sub> (BDC) <sub>2</sub> (dabco)                              |             | 35             | 303             | 11.4          | H. Wang et al., 2008 <sup>86</sup>               |
|                                                                         |             | 75             | 303             | 12.28         | H. Wang et al., 2008 <sup>86</sup>               |
| Co <sub>2</sub> (dobdc)                                                 | Co-MOF-74   | 35             | 298             | 11            | Mason, Veenstra and Long, 2014 <sup>87</sup>     |
| Cu <sub>2</sub> (BDC) <sub>2</sub> (dabco)                              |             | 35             | 293             | 10.8          | Seki and Mori, 2002 <sup>88</sup>                |
|                                                                         |             | 35             | 298             | 13.2          | Seki, 2001 <sup>89</sup>                         |
| Cu <sub>3</sub> (BTC) <sub>2</sub>                                      |             | 35             | 303             | 12.7          | Senkovska and Kaskel, 2008 <sup>90</sup>         |
| Cu <sub>3</sub> (TDPAT)                                                 | Cu-TDPAT    | 35             | 298             | 13.2          | Li et al., 2012 <sup>91</sup>                    |
| Al(OH)(NDC)                                                             | DUT-4       | 35             | 303             | 8.8           | Senkovska et al., 2009 <sup>92</sup>             |
| Al(OH)(bpdc)                                                            | DUT-5       | 35             | 303             | 9.8           | Senkovska et al., 2009 <sup>92</sup>             |
| Co <sub>2</sub> (NDC) <sub>2</sub> (dabco)                              | DUT-8(Co)   | 60             | 298             | 4.5           | Klein et al., 2012 <sup>93</sup>                 |
| Cu <sub>2</sub> (NDC) <sub>2</sub> (dabco)                              | DUT-8(Cu)   | 60             | 298             | 12.8          | Klein et al., 2012 <sup>93</sup>                 |
| Zn <sub>2</sub> (NDC) <sub>2</sub> (dabco)                              | DUT-8(Zn)   | 60             | 298             | 3.7           | Klein et al., 2012 <sup>93</sup>                 |
| Ni <sub>5</sub> O <sub>2</sub> (BTB) <sub>2</sub>                       | DUT-9       | 30             | 298             | 12            | Gedrich et al., 2010 <sup>94</sup>               |
|                                                                         |             | 70             | 298             | 17.3          |                                                  |
| Zn <sub>4</sub> O(TCPBDA) <sub>3/2</sub>                                | DUT-13      | 50             | 298             | 13.9          | Grünker et al., 2011 <sup>95</sup>               |
| Co <sub>2</sub> (bipy) <sub>3</sub> (BTB) <sub>4</sub>                  | DUT-23(Co)  | 100            | 298             | 21.1          | Klein et al., 2011 <sup>96</sup>                 |
| Cu <sub>2</sub> (BBCDC)                                                 | DUT-49      | 35             | 298             | 19.2          | Stoeck et al., 2012 <sup>97</sup>                |
| Zn <sub>6</sub> (BTB) <sub>4</sub> (4,4'-bpy) <sub>3</sub>              | FJI-1       | 35             | 273             | 20.6          | Han et al., 2011 <sup>19</sup>                   |
|                                                                         |             | 35             | 298             | 15.2          |                                                  |
| Cu <sub>3</sub> (BTC) <sub>2</sub>                                      | HKUST-1     | 35             | 298             | 15.5          | Peng, Krungleviciute, et al., 2013 <sup>98</sup> |
|                                                                         |             | 65             | 298             | 17.8          |                                                  |
| Zn <sub>4</sub> O(NH <sub>2</sub> -bdc) <sub>3</sub>                    | IRMOF-3     | 36.5           | 298             | 13            | Eddaoudi et al., 2002 <sup>99</sup>              |
| Zn <sub>4</sub> O(C <sub>2</sub> H <sub>4</sub> -bdc) <sub>3</sub>      | IRMOF-6     | 36.5           | 298             | 19.4          | Eddaoudi et al., 2002 <sup>99</sup>              |
| Zn <sub>4</sub> O(NDC) <sub>3</sub>                                     | IRMOF-8     | 35             | 298             | 12.2          | Feldblyum et al., 2013 <sup>100</sup>            |

|                                                                      |                          |      |     |       |                                              |
|----------------------------------------------------------------------|--------------------------|------|-----|-------|----------------------------------------------|
| Mg <sub>2</sub> (dobdc)                                              | Mg-MOF-74, CPO-27-Mg     | 35   | 298 | 13.62 | Mason, Veenstra and Long, 2014 <sup>87</sup> |
| Al(OH)(bdc)                                                          | MIL-53(Al)               | 35   | 298 | 10.6  | Bolinois et al, 2017 <sup>101</sup>          |
| Cr(OH)(bdc)                                                          | MIL-53(Cr)               | 30   | 304 | 8.8   | Bourrelly et al., 2005 <sup>102</sup>        |
| Cr <sub>3</sub> OF(BTC) <sub>2</sub>                                 | MIL-100(Cr)              | 35   | 303 | 10.7  | Llewellyn et al., 2008 <sup>103</sup>        |
| Fe <sub>3</sub> OF(BTC) <sub>2</sub>                                 | MIL-100(Fe)              | 35   | 303 | 8.8   | Wiersum et al., 2013 <sup>104</sup>          |
| Cr <sub>3</sub> OF(H <sub>2</sub> O) <sub>2</sub> (bdc) <sub>3</sub> | MIL-101(Cr)              | 35   | 303 | 9.3   | Wiersum et al., 2013 <sup>104</sup>          |
| Ti <sub>8</sub> O <sub>8</sub> (OH) <sub>4</sub> (bdc) <sub>6</sub>  | MIL-125                  | 35   | 303 | 9.7   | Wiersum et al., 2013 <sup>104</sup>          |
| Mn <sub>2</sub> (dobdc)                                              | Mn-MOF-74, CPO-27-Mn     | 35   | 297 | 9.6   | Wu, Zhou and Yildirim, 2009 <sup>105</sup>   |
| Zn <sub>4</sub> O(bdc) <sub>3</sub>                                  | MOF-5 or IRMOF-1         | 36.5 | 298 | 15.1  | Eddaoudi et al., 2002 <sup>99</sup>          |
| Zn 4O(BTB) 2                                                         | MOF -177                 | 35   | 298 | 13.8  | Furukawa et al., 2010 <sup>34</sup>          |
|                                                                      |                          | 65   | 298 | 19.5  |                                              |
| Zn 4O(BBC ) 2                                                        | MOF -200                 | 10   | 298 | 5.12  | Furukawa et al., 2010 <sup>34</sup>          |
|                                                                      |                          | 35   | 298 | 11.5  |                                              |
|                                                                      |                          | 65   | 298 | 17.5  |                                              |
| Zn 4O(BTB)4/3(NDC)                                                   | MOF -205                 | 10   | 298 | 5.7   | Furukawa et al., 2010 <sup>34</sup>          |
|                                                                      |                          | 35   | 298 | 14.9  |                                              |
|                                                                      |                          | 65   | 298 | 20    |                                              |
| Zn 4O(BTE)4/3(bpdc)                                                  | MOF -210                 | 35   | 298 | 13.2  | Furukawa et al., 2010 <sup>34</sup>          |
|                                                                      |                          | 65   | 298 | 19.3  |                                              |
| Cu 2(bptc)                                                           | MOF -505, NOTT -100      | 35   | 300 | 13.3  | He, Zhou, et al., 2013 <sup>106</sup>        |
|                                                                      |                          | 65   | 270 | 16.2  |                                              |
| Ni 2(dobdc)                                                          | Ni -MOF -74, CPO -27 -Ni | 35   | 298 | 12.2  | Mason, Veenstra and Long, 2014 <sup>87</sup> |
| Cu 6(BDPP) 3(H <sub>2</sub> O) 6                                     | NJU -Bai10               | 35   | 290 | 17.6  | Lu et al., 2013 <sup>107</sup>               |
| Cu 2(tptc)                                                           | NOTT -101                | 35   | 300 | 17    | He, Zhou, et al., 2013 <sup>106</sup>        |
|                                                                      |                          | 65   | 300 | 19.8  |                                              |
| Cu 2(qptc)                                                           | NOTT -102                | 35   | 300 | 18.1  | He, Zhou, et al., 2013 <sup>106</sup>        |
|                                                                      |                          | 65   | 300 | 22.2  |                                              |
| Cu 2(2,6 -nddi)                                                      | NOTT -103                | 35   | 300 | 17.9  | He, Zhou, et al., 2013 <sup>106</sup>        |

|                      |                    |    |     |      |                                                    |
|----------------------|--------------------|----|-----|------|----------------------------------------------------|
|                      |                    | 65 | 300 | 20.8 |                                                    |
| Cu 2(C26 H20 O 8 )   | NOTT -107          | 35 | 298 | 15.7 | He,Zhou et al., 2014 <sup>108</sup>                |
| Cu 2(1,4 -nddi)      | NOTT -109          | 35 | 300 | 15.1 | He,Zhou et al., 2014 <sup>108</sup>                |
|                      |                    | 65 | 300 | 18   |                                                    |
| Cu 3(C66 H36 O12 )   | NOTT -119          | 35 | 298 | 16.2 | Yan, Yang, et al., 2011 <sup>44</sup>              |
| Cu 3 (btdi )(H 2O) 3 | NU -111            | 35 | 298 | 19.8 | Peng, Srinivas, et al., 2013 <sup>109</sup>        |
|                      |                    | 65 | 270 | 32.9 |                                                    |
| Cu 3(TIPTB)          | NU -125, NOTT -122 | 35 | 298 | 18.3 | Wilmer et al., 2013 <sup>110</sup>                 |
|                      |                    | 65 | 298 | 22   |                                                    |
| Cu 3(TIPTPB)(H 2O) 3 | NU -140            | 65 | 270 | 29.6 | Barin et al., 2014 <sup>111</sup>                  |
|                      |                    | 65 | 300 | 25.4 |                                                    |
| Zr 6 O 4(OH) 4(TPT)  | NU -800            | 35 | 298 | 15.2 | Gomez -Gualdrón et al., 2014 <sup>112</sup>        |
|                      |                    | 65 | 270 | 27.7 |                                                    |
| Cu 2(sbtc)           | PCN -11            | 35 | 298 | 14.5 | X. -S. Wang, Ma, Rauch, et al., 2008 <sup>52</sup> |
| Cu 2(adip)           | PCN -14            | 65 | 270 | 33.3 | Peng, Srinivas, et al., 2013 <sup>109</sup>        |
|                      |                    | 65 | 298 | 26.4 |                                                    |
| Cu 2(ebdc)           | PCN -16            | 35 | 300 | 15.9 | He,Zhou et al., 2014 <sup>108</sup>                |
| Cu 2(bdi)            | PCN -46            | 35 | 298 | 19.4 | Zhao et al., 2010 <sup>56</sup>                    |
| Cu 3(btei)           | PCN -61            | 35 | 298 | 16.7 | Yuan et al., 2010 <sup>57</sup>                    |
| Cu 3(ntei)           | PCN -66            | 35 | 298 | 16.6 | Yuan et al., 2010 <sup>57</sup>                    |
| Cu 3(ptei)           | PCN -68            | 35 | 298 | 17.9 | Yuan et al., 2010 <sup>57</sup>                    |
| Cu 2(bttcd)          | PCN -80            | 35 | 296 | 15   | Lu et al., 2012 <sup>113</sup>                     |
| Zn 2 (TCPBDA )       | SNU -30            | 50 | 194 | 6.4  | Park, Cheon and Suh, 2010 <sup>62</sup>            |
|                      |                    | 50 | 298 | 4.5  |                                                    |
| Zn 2(TCPBDA)(bpta)   | SNU -31            | 50 | 298 | 1.5  | Park, Cheon and Suh, 2010 <sup>62</sup>            |
| Cu 2(bdcppi)         | SNU -50            | 1  | 195 | 10.6 | Prasad, Hong and Suh, 2010 <sup>64</sup>           |
|                      |                    | 61 | 298 | 14.5 |                                                    |
| Zn 4O(CVB ) 3        | SNU -70            | 1  | 195 | 3.8  | Prasad and Suh, 2012 <sup>114</sup>                |
|                      |                    | 45 | 298 | 18.3 |                                                    |

|                       |                      |    |     |       |                                            |
|-----------------------|----------------------|----|-----|-------|--------------------------------------------|
| Zn 4O(CEB) 3          | SNU -71              | 1  | 195 | 4.7   | Prasad and Suh, 2012 <sup>114</sup>        |
|                       |                      | 45 | 298 | 10.8  |                                            |
| Zn 4O(TCBPA) 2        | SNU -77H             | 1  | 195 | 8.04  | H. J. Park et al., 2011 <sup>66</sup>      |
|                       |                      | 35 | 298 | 17.8  |                                            |
|                       |                      | 60 | 298 | 18.08 |                                            |
| Zr 6 O 4(OH) 4(bdc) 6 | UiO -66              | 35 | 303 | 6.7   | Wiersum et al., 2013 <sup>104</sup>        |
| Zr6O4(OH)4(NH2-bdc)6  | UiO-66-NH2           | 35 | 303 | 7.5   | Wiersum et al., 2013 <sup>104</sup>        |
| Cu3(BHB)              | UTSA-20a             | 35 | 298 | 12.5  | He,Zhou et al., 2014 <sup>108</sup>        |
|                       |                      | 65 | 298 | 14.2  |                                            |
| Cu3(TIPAB)            | UTSA-34              | 35 | 290 | 11.9  | He,Zhou et al., 2014 <sup>108</sup>        |
| Zn4O(NDC)3            | UTSA-38              | 35 | 300 | 7.5   | Das et al., 2011 <sup>115</sup>            |
| Cu2(dceci)            | UTSA-40              | 35 | 300 | 12    | He, Xiang, et al., 2013 <sup>116</sup>     |
| Cu2(PDD)(H2O)2        | UTSA-75              | 65 | 298 | 20.4  | Li et al., 2015 <sup>117</sup>             |
| Cu2(PDDP)(H2O)2       | UTSA-76              | 65 | 298 | 20.8  | Li et al., 2015 <sup>117</sup>             |
| Cu2(tpc)(PDDP)(H2O)2  | UTSA-77              | 65 | 298 | 20.4  | Li et al., 2015 <sup>117</sup>             |
| Cu2(DCPAI)(H2O)2      | UTSA-80              | 65 | 298 | 19.4  | Wen et al., 2014 <sup>118</sup>            |
| Cu2(DFMTP)(H2O)2      | UTSA-88              | 65 | 298 | 17.1  | Chang et al., 2015 <sup>119</sup>          |
| Zn(MeIM)2             | ZIF-8                | 36 | 300 | 7     | Zhou et al., 2007 <sup>72</sup>            |
| Cu2(BDPP)(H2O)2       | ZJU-5                | 65 | 298 | 20.8  | Li et al., 2015 <sup>117</sup>             |
| Cu2(FDDI)             | ZJU-25               | 35 | 300 | 17.2  | He,Zhou et al., 2014 <sup>108</sup>        |
| Cu2(cpda)             | ZJU-36               | 35 | 300 | 17    | He,Zhou et al., 2014 <sup>108</sup>        |
|                       |                      | 65 | 300 | 22.7  |                                            |
| Cu6(CTIA)2            | ZJU-70               | 35 | 298 | 12.7  | Duan et al., 2015 <sup>120</sup>           |
|                       |                      | 65 | 270 | 16.3  |                                            |
| Cu2(BDEDDI)(H2O)2     | ZJUN-50              | 35 | 298 | 17.6  | Song, Ling, et al., 2015 <sup>121</sup>    |
|                       |                      | 65 | 298 | 21.5  |                                            |
| Zn2(BDC)2(dabco)      |                      | 35 | 303 | 12.5  | Senkovska and Kaskel, 2008 <sup>90</sup>   |
| Zn3O(2,7-ndc)2        |                      | 35 | 298 | 7.3   | Park et al., 2009 <sup>122</sup>           |
| Zn2(dobdc)            | Zn-MOF-74, CPO-27-Zn | 35 | 298 | 9.1   | Wu, Zhou and Yildirim, 2009 <sup>105</sup> |



Table S3: MOF structures with literature CO<sub>2</sub> uptakes

| MOF Name                                                                                               | Common Name | Pressure (Bar) | Temperature (K) | Uptake (% wt) | Reference                                                  |
|--------------------------------------------------------------------------------------------------------|-------------|----------------|-----------------|---------------|------------------------------------------------------------|
| Al <sub>3</sub> (TCPT) <sub>6</sub>                                                                    | Alsoc-MOF1  | 40             | 298             | 66.7          | Alezi et al., 2015 <sup>82</sup>                           |
| Zn <sub>8</sub> (ad) <sub>4</sub> (BPDC) <sub>6</sub> O <sub>2</sub> Me <sub>2</sub> NH <sub>2</sub>   | Bio-MOF-1   | 1              | 313             | 5.48          | An and Rosi, 2010 <sup>123</sup>                           |
| Co <sub>2</sub> (ad) <sub>2</sub> (CO <sub>2</sub> CH <sub>3</sub> ) <sub>2</sub> ·2DMF                | Bio-MOF-11  | 1              | 298             | 15.3          | An, Geib and Rosi, 2010 <sup>123</sup>                     |
| Al <sub>4</sub> (OH) <sub>2</sub> (OCH <sub>3</sub> ) <sub>4</sub> (NH <sub>2</sub> -bdc) <sub>3</sub> | CAU-1       | 1              | 273             | 24.1          | Si et al., 2011 <sup>124</sup>                             |
| Cd(DBNBVP) <sub>2</sub> (ClO <sub>4</sub> ) <sub>2</sub>                                               |             | 1              | 273             | 12.3          | Wu and Lin, 2005 <sup>125</sup>                            |
| Cd <sub>2</sub> (HFIDP)(H <sub>2</sub> O) <sub>2</sub>                                                 |             | 1              | 195             | 12.7          | Hou et al., 2011 <sup>126</sup>                            |
|                                                                                                        |             | 1              | 293             | 8.5           |                                                            |
| Cd <sub>6</sub> (CPOM) <sub>3</sub> (H <sub>2</sub> O) <sub>6</sub>                                    |             | 1              | 297             | 5.6           | Tian, J et al., 2010 <sup>127</sup>                        |
|                                                                                                        |             | 30             | 297             | 14            |                                                            |
| Cd(ADA)(4,4'-bipy) <sub>0.5</sub> (DMF)                                                                | Cd-ADA-1    | 1              | 298             | 3.4           | Pachfule et al., 2010 <sup>128</sup>                       |
| Cd(MeIm) <sub>2</sub>                                                                                  | CdIF-1      | 1              | 273             | 5.6           | Tian, Y.-Q et al., 2010 <sup>129</sup>                     |
| Cd(eIm) <sub>2</sub>                                                                                   | CdIF-4      | 1              | 273             | 4             | Tian, Y.-Q et al., 2010 <sup>129</sup>                     |
| Cd(nIm) <sub>2</sub>                                                                                   | CdIF-9      | 1              | 273             | 8.8           | Tian, Y.-Q et al., 2010 <sup>129</sup>                     |
| Co(BDP)                                                                                                |             | 40             | 313             | 41.3          | Herm et al., 2011 <sup>130</sup>                           |
| Co(tImb)                                                                                               |             | 1              | 298             | 7.2           | Chen, S.-S et al., 2011 <sup>131</sup>                     |
| Co(tImb).DMF.H <sub>2</sub> O                                                                          |             | 1              | 298             | 11.7          | Chen, S.-S et al., 2011 <sup>131</sup>                     |
| Co <sub>2</sub> (dobdc)                                                                                | Co-MOF-74   | 0.1            | 296             | 10.36         | Caskey, Wong-Foy and Matzger, 2008 <sup>132</sup>          |
|                                                                                                        |             | 1              | 296             | 23.6          |                                                            |
| Zn(BTT)                                                                                                | CPF-6       | 1              | 273             | 16.2          | Lin et al., 2012 <sup>133</sup>                            |
| Cu <sub>2</sub> (pmdc) <sub>2</sub> (bpy)                                                              | CPL-2       | 1              | 298             | 6.6           | García-Ricard and Hernández Maldonado, 2010 <sup>134</sup> |
| Ni <sub>3</sub> (OH)(bdc) <sub>3</sub> (tpt)                                                           | CPM-33a     | 1              | 273             | 21.2          | Zhao et al., 2015 <sup>135</sup>                           |
|                                                                                                        |             | 1              | 298             | 12.7          |                                                            |
| Ni <sub>3</sub> (OH)(dobdc) <sub>3</sub> (tpt)                                                         | CPM-33b     | 1              | 273             | 25.6          | Zhao et al., 2015 <sup>135</sup>                           |
|                                                                                                        |             | 1              | 298             | 19.8          |                                                            |

|                                                                                                                                                                                                                  |              |      |     |      |                                          |
|------------------------------------------------------------------------------------------------------------------------------------------------------------------------------------------------------------------|--------------|------|-----|------|------------------------------------------|
| (CH <sub>3</sub> ) <sub>2</sub> NH <sub>2</sub> ][In <sub>3</sub> O(BTC) <sub>2</sub> (H <sub>2</sub> O) <sub>3</sub> ] <sub>2</sub> [In <sub>3</sub> (BTC) <sub>4</sub> ] <sub>2</sub> ·7DMF·23H <sub>2</sub> O | CPM-5        | 1    | 273 | 13.7 | S.-T. Zheng et al., 2010 <sup>136</sup>  |
|                                                                                                                                                                                                                  |              | 1    | 299 | 9.6  |                                          |
| Cu(2-pymo) <sub>2</sub>                                                                                                                                                                                          |              | 0.86 | 293 | 3.8  | Navarro et al., 2006 <sup>137</sup>      |
| Cu(BDC-OH)                                                                                                                                                                                                       |              | 2    | 296 | 8.9  | Xiang et al., 2012 <sup>138</sup>        |
| Cu <sub>2</sub> (pmdc) <sub>2</sub> (pz)                                                                                                                                                                         |              | 1    | 300 | 6.4  | Kitaura et al., 2005 <sup>139</sup>      |
| Cu <sub>3</sub> (BTB)                                                                                                                                                                                            |              | 20   | 273 | 61.1 | Zheng et al., 2012 <sup>140</sup>        |
| Cu <sub>3</sub> (BTC) <sub>2</sub>                                                                                                                                                                               |              | 1    | 296 | 18.8 | Xiang et al., 2012 <sup>138</sup>        |
| Cu <sub>4</sub> O(OH) <sub>2</sub> (Me <sub>2</sub> trzpba) <sub>4</sub>                                                                                                                                         |              | 1    | 298 | 5.8  | Lincke et al., 2011 <sup>141</sup>       |
| Cu-BTTri                                                                                                                                                                                                         |              | 1    | 298 | 12.3 | Demessence et al., 2009 <sup>142</sup>   |
|                                                                                                                                                                                                                  |              | 40   | 313 | 42.8 |                                          |
| Cu <sub>3</sub> (TDPAT)(H <sub>2</sub> O) <sub>3</sub>                                                                                                                                                           | Cu-TDPAT     | 0.1  | 298 | 5.8  | Li et al., 2012 <sup>91</sup>            |
|                                                                                                                                                                                                                  |              | 1    | 298 | 20.6 |                                          |
| Cu <sub>3</sub> (TPBTM)(H <sub>2</sub> O) <sub>3</sub>                                                                                                                                                           | Cu-TPBTM     | 20   | 298 | 50.8 | Baishu Zheng et al., 2011 <sup>143</sup> |
| Fe <sub>3</sub> [(Fe <sub>4</sub> Cl) <sub>3</sub> (BTT) <sub>8</sub> (MeOH) <sub>4</sub> ] <sub>2</sub>                                                                                                         | Fe-BTT       | 1    | 298 | 12   | Sumida et al., 2010 <sup>144</sup>       |
| Fe <sub>3</sub> O(OH)(BTC) <sub>2</sub>                                                                                                                                                                          | Fe-MIL-100   | 0.9  | 298 | 6.6  | Mason et al., 2015 <sup>145</sup>        |
| Fe(pz)Ni(CN) <sub>4</sub>                                                                                                                                                                                        |              | 1    | 298 | 9.3  | Sumida et al 2012 <sup>146</sup>         |
| Cu(BTTA)(H <sub>2</sub> O)                                                                                                                                                                                       | FJI-H14      | 1    | 195 | 35.5 | Liang et al., 2017 <sup>147</sup>        |
|                                                                                                                                                                                                                  |              | 1    | 298 | 22.2 |                                          |
| Zn(bcphfp)                                                                                                                                                                                                       | FMOF-2       | 1    | 298 | 4.5  | Fernandez et al., 2010 <sup>148</sup>    |
| Cu <sub>3</sub> (BTC) <sub>2</sub>                                                                                                                                                                               | HKUST-1      | 1    | 298 | 15.3 | Millward and Yaghi, 2005 <sup>149</sup>  |
|                                                                                                                                                                                                                  |              | 30   | 298 | 31.9 |                                          |
| [Zn <sub>3</sub> (pbdc) <sub>2</sub> ] <sub>2</sub> ·HPIP·H <sub>3</sub> O·5H <sub>2</sub> O                                                                                                                     | HPIP@ZnPC -2 | 0.15 | 298 | 4.6  | Ling et al., 2013 <sup>150</sup>         |
| [Zn <sub>3</sub> (pbdc) <sub>2</sub> ] <sub>2</sub> ·HPYR·H <sub>3</sub> O·4H <sub>2</sub> O                                                                                                                     | HPYR@ZnP C-2 | 0.15 | 298 | 3    | Ling et al., 2013 <sup>150</sup>         |
| Zn(BHTHT)                                                                                                                                                                                                        | IFMC-1       | 1    | 195 | 24.8 | Qin et al., 2012 <sup>151</sup>          |
|                                                                                                                                                                                                                  |              | 1    | 273 | 15.3 |                                          |
|                                                                                                                                                                                                                  |              | 1    | 298 | 10.6 |                                          |
| Zn(Mlai)                                                                                                                                                                                                         | IMOF-3       | 1    | 273 | 7.2  | Debatin et al., 2010 <sup>81</sup>       |
| In <sub>2</sub> (OH) <sub>2</sub> (obb) <sub>2</sub>                                                                                                                                                             |              | 1    | 298 | 8.6  | Y.-X. Tan et al., 2011 <sup>152</sup>    |
| In <sub>3</sub> O(abtc) <sub>1.5</sub> (H <sub>2</sub> O) <sub>3</sub> (NO <sub>3</sub> )                                                                                                                        | socMOF M080  | 1    | 273 | 17.9 | Moellmer et al., 2010 <sup>153</sup>     |



|                                                                        |                                                   |     |     |      |                                         |
|------------------------------------------------------------------------|---------------------------------------------------|-----|-----|------|-----------------------------------------|
| In <sub>3</sub> (BTC) <sub>4</sub> (choline)                           |                                                   | 1   | 273 | 12.3 | Chen et al., 2009 <sup>154</sup>        |
| Zn <sub>4</sub> O(NH <sub>2</sub> -BDC) <sub>2</sub>                   | IRMOF-3                                           | 1.1 | 298 | 5.1  | Millward and Yaghi, 2005 <sup>149</sup> |
|                                                                        |                                                   | 35  | 298 | 45.1 |                                         |
| Zn <sub>4</sub> O(dobdc) <sub>2</sub>                                  | IRMOF-6                                           | 1.2 | 298 | 4.6  | Millward and Yaghi, 2005 <sup>149</sup> |
|                                                                        |                                                   | 40  | 298 | 46.6 |                                         |
| Zn <sub>4</sub> O(NDC) <sub>3</sub>                                    | IRMOF-8                                           | 1   | 273 | 12.2 | Orefuwa et al., 2013 <sup>155</sup>     |
|                                                                        |                                                   | 30  | 273 | 38.6 |                                         |
|                                                                        |                                                   | 30  | 298 | 34   |                                         |
| Zn <sub>4</sub> O(HPDC) <sub>2</sub>                                   | IRMOF-11                                          | 1.1 | 298 | 7.3  | Millward and Yaghi, 2005 <sup>149</sup> |
|                                                                        |                                                   | 35  | 298 | 39.3 |                                         |
| Zn <sub>4</sub> O(TPDC) <sub>3</sub>                                   | IRMOF-16                                          | 1   | 298 | 5.4  | Bae et al., 2009 <sup>156</sup>         |
| Mg <sub>2</sub> (DH <sub>3</sub> PhDC)-CH <sub>2</sub> NH <sub>2</sub> | IRMOF-74- III-<br>CH <sub>2</sub> NH <sub>2</sub> | 1   | 298 | 12.3 | Fracaroli et al., 2014 <sup>157</sup>   |
| Fe <sub>3</sub> O(TCDC)(H <sub>2</sub> O) <sub>3</sub>                 | LIFM-26                                           | 1   | 273 | 19.2 | C.-X Chen et al., 2017 <sup>158</sup>   |
|                                                                        |                                                   | 1   | 298 | 12.7 |                                         |
| Zr <sub>6</sub> O <sub>8</sub> (TDA)(H <sub>2</sub> O) <sub>8</sub>    | LIFM-29                                           | 1   | 273 | 9.9  | C.-X. Chen et al., 2016 <sup>159</sup>  |
|                                                                        |                                                   | 1   | 298 | 6.13 |                                         |
| Zr <sub>6</sub> O <sub>8</sub> (tftpa)(H <sub>2</sub> O) <sub>8</sub>  | LIFM-30                                           | 1   | 273 | 10.3 | C.-X. Chen et al., 2016 <sup>159</sup>  |
|                                                                        |                                                   | 1   | 298 | 4.9  |                                         |
| Zr <sub>6</sub> O <sub>8</sub> (NDC)(H <sub>2</sub> O) <sub>8</sub>    | LIFM-31                                           | 1   | 273 | 10.3 | C.-X. Chen et al., 2016 <sup>159</sup>  |
|                                                                        |                                                   | 1   | 298 | 6.5  |                                         |
| Zr <sub>6</sub> O <sub>8</sub> (dhbpd)(H <sub>2</sub> O) <sub>8</sub>  | LIFM-32                                           | 1   | 273 | 10.6 | C.-X. Chen et al., 2016 <sup>159</sup>  |
|                                                                        |                                                   | 1   | 298 | 5.25 |                                         |
| Zr <sub>6</sub> O <sub>8</sub> (dabpd)(H <sub>2</sub> O) <sub>8</sub>  | LIFM-33                                           | 1   | 273 | 13.7 | C.-X. Chen et al., 2016 <sup>159</sup>  |
|                                                                        |                                                   | 1   | 298 | 7.08 |                                         |
| Cu(et <sub>3</sub> )                                                   | MAF-2                                             | 1   | 298 | 3.6  | Zhang and Chen, 2009 <sup>160</sup>     |
|                                                                        |                                                   | 1   | 273 | 8.84 |                                         |
| Zn <sub>2</sub> (btm) <sub>2</sub>                                     | MAF-23                                            | 1   | 273 | 12.7 | Liao et al., 2012 <sup>161</sup>        |
|                                                                        |                                                   | 1   | 298 | 9.9  |                                         |

|                             |                      |      |     |      |                                                   |
|-----------------------------|----------------------|------|-----|------|---------------------------------------------------|
| Co(dpt24)2                  | MAF-25               | 1    | 195 | 18.6 | Lin, Zhang and Chen, 2010 <sup>162</sup>          |
|                             |                      | 1    | 273 | 4.83 |                                                   |
|                             |                      | 1    | 283 | 3    |                                                   |
| Co(mdpt24)2                 | MAF-26               | 1    | 195 | 14.3 | Lin, Zhang and Chen, 2010 <sup>162</sup>          |
|                             |                      | 1    | 273 | 3.75 |                                                   |
|                             |                      | 1    | 283 | 2.9  |                                                   |
| Zn(atz)2                    | MAF-66               | 1    | 273 | 21.7 | Lin et al., 2012 <sup>163</sup>                   |
|                             |                      | 1    | 298 | 16.2 |                                                   |
| Mg(TCPBDA)                  |                      | 1    | 195 | 20.9 | Cheon et al 2009 <sup>164</sup>                   |
|                             |                      | 1    | 273 | 8.3  |                                                   |
|                             |                      | 1    | 298 | 6.2  |                                                   |
| Mg2(dobpdc)                 |                      | 0.15 | 298 | 12.1 | McDonald et al., 2012 <sup>165</sup>              |
|                             |                      | 1    | 298 | 14.5 |                                                   |
| Mg(3,5-pdc)                 | Mg-MOF-1             | 1    | 298 | 2.7  | Mallick et al., 2010 <sup>166</sup>               |
| Mg2(dobdc)                  | Mg-MOF74, MgCPO-27   | 0.1  | 298 | 20.3 | Bao et al., 2011 <sup>167</sup>                   |
|                             |                      | 1    | 298 | 27.5 | Dietzel, Besikiotis and Blom, 2009 <sup>168</sup> |
|                             |                      | 36   | 278 | 40.8 |                                                   |
| Al(OH)(bdc)                 | MIL-53(Al), USO-1-Al | 1    | 303 | 9.2  | Rallapalli et al., 2011 <sup>169</sup>            |
|                             |                      | 25   | 304 | 30.6 | Bourrelly et al., 2005 <sup>102</sup>             |
| Cr(OH)(bdc)                 | MIL-53(Cr)           | 1    | 304 | 8.1  | Bourrelly et al., 2005 <sup>102</sup>             |
|                             |                      | 25   | 304 | 30.8 |                                                   |
| Al12O(OH)18(Al2(OH)4)(BTC)6 | MIL-96(Al)           | 10   | 303 | 16.2 | Loiseau et al., 2006 <sup>170</sup>               |
|                             |                      | 20   | 303 | 18.6 |                                                   |
| Cr3OF(H2O)3(BTC)2           | MIL-100(Cr)          | 50   | 304 | 44.2 | Llewellyn et al., 2008 <sup>103</sup>             |
| Cr3OF(H2O)2(BDC)3           | MIL-101(Cr)          | 1    | 296 | 5.8  | Chowdhury et al., 2012 <sup>171</sup>             |
|                             |                      | 50   | 304 | 56.9 | Llewellyn et al., 2008 <sup>103</sup>             |
| Cr3OF(H2O)2(NTC)1.5         | MIL-102(Cr)          | 30   | 304 | 12   | Surbélé et al., 2006 <sup>172</sup>               |
| Al4(OH)8(C10O8H2)           | MIL-120              | 10   | 303 | 15.6 | Volkringer et al., 2009 <sup>173</sup>            |
| mmen-Cu-BTtri               |                      | 1    | 298 | 15.6 | McDonald et al., 2011 <sup>174</sup>              |

|                                                                          |                            |     |     |       |                                                    |
|--------------------------------------------------------------------------|----------------------------|-----|-----|-------|----------------------------------------------------|
| Mn(bdc)(dpe)                                                             |                            | 1   | 195 | 17.7  | Foo et al., 2016 <sup>175</sup>                    |
| Mn(NDC)(DEF)                                                             |                            | 1   | 195 | 11.7  | Hoi, Kobayashi and Myunghyun., 2006 <sup>176</sup> |
|                                                                          |                            | 1   | 273 | 6.2   |                                                    |
| Mn(pmde)                                                                 |                            | 0.9 | 293 | 7.3   | Beobide et al., 2008 <sup>177</sup>                |
| [Mn <sub>2</sub> (2,6-ndc) <sub>2</sub> (bpda) <sub>2</sub> ]-5DMF       | Mn-bpda                    | 1   | 195 | 24.5  | Lee et al., 2016 <sup>178</sup>                    |
|                                                                          |                            | 35  | 298 | 21.6  |                                                    |
| Zn <sub>3</sub> (bdc) <sub>3</sub>                                       | MOF-2                      | 1   | 298 | 2.4   | Millward and Yaghi, 2005 <sup>149</sup>            |
|                                                                          |                            | 30  | 298 | 11.97 |                                                    |
| Zn <sub>4</sub> O(bdc) <sub>3</sub>                                      | MOF-5 or IRMOF-1           | 1   | 296 | 3.94  | Millward and Yaghi, 2005 <sup>149</sup>            |
|                                                                          |                            | 35  | 298 | 48.8  |                                                    |
| Zn <sub>4</sub> O(BTB) <sub>2</sub>                                      | MOF-177                    | 1   | 298 | 6.5   | Saha et al., 2010 <sup>179</sup>                   |
|                                                                          |                            | 50  | 298 | 60.8  | Furukawa et al., 2010 <sup>34</sup>                |
| Zn <sub>4</sub> O(BBC) <sub>2</sub> (H <sub>2</sub> O) <sub>3</sub>      | MOF-200                    | 50  | 298 | 73.9  | Furukawa et al., 2010 <sup>34</sup>                |
| Zn <sub>4</sub> O(BTB)(NDC)(H <sub>2</sub> O) <sub>3</sub>               | MOF-205                    | 50  | 298 | 62.6  | Furukawa et al., 2010 <sup>34</sup>                |
| Zn <sub>4</sub> O(BTE)(BPDC)(H <sub>2</sub> O) <sub>3</sub>              | MOF-210                    | 50  | 298 | 74.2  | Furukawa et al., 2010 <sup>34</sup>                |
| Al(OH)(bpydc)                                                            | MOF-253                    | 1   | 298 | 6.2   | Bloch et al., 2010 <sup>177</sup>                  |
| Cu <sub>2</sub> (bptc)(H <sub>2</sub> O) <sub>2</sub> (DMF) <sub>3</sub> | MOF-505                    | 1.1 | 298 | 12.6  | Millward and Yaghi, 2005 <sup>149</sup>            |
| Zn <sub>2</sub> (BDC) <sub>2</sub> (4,4'-bpy)                            | MOF-508                    | 5   | 303 | 20.6  | Bárcia et al., 2008 <sup>180</sup>                 |
| Al(ABDC)(OH)                                                             | NH <sub>2</sub> -MIL53(Al) | 5   | 303 | 8.4   | Couck et al., 2009 <sup>181</sup>                  |
|                                                                          |                            | 13  | 303 | 22.8  |                                                    |
| Ti(NH <sub>2</sub> -bdc) <sub>2</sub>                                    | NH <sub>2</sub> -MIL125    | 1   | 273 | 15    | Kim et al., 2013 <sup>63</sup>                     |
|                                                                          |                            | 1   | 298 | 8.8   |                                                    |
| Ni(DBNBVP) <sub>2</sub> Cl <sub>2</sub>                                  |                            | 1   | 273 | 8.1   | Wu and Lin, 2006 <sup>182</sup>                    |
| Ni <sub>3</sub> (L-TMTA) <sub>2</sub> (bpy) <sub>4</sub>                 |                            | 1   | 298 | 8.2   | Z. Chen et al., 2011 <sup>183</sup>                |
| Ni-4Pyc                                                                  |                            | 10  | 298 | 26.5  | Nandi et al., 2015 <sup>184</sup>                  |
| Ni <sub>2</sub> (dobdc)                                                  | Ni-MOF-74, CPO-27-N        | 0.1 | 296 | 10.3  | Caskey, Wong-Foy and Matzger, 2008 <sup>132</sup>  |
|                                                                          |                            | 1   | 296 | 20.3  |                                                    |
|                                                                          |                            | 22  | 278 | 34.4  | Dietzel, Besikiotis and Blom, 2009 <sup>168</sup>  |

|                                                                                                  |                  |      |     |       |                                             |
|--------------------------------------------------------------------------------------------------|------------------|------|-----|-------|---------------------------------------------|
| Cu <sub>3</sub> (cobai) <sub>2</sub> (H <sub>2</sub> O) <sub>5</sub>                             | NJU-Bai3         | 1    | 273 | 21.5  | Duan et al., 2012 <sup>185</sup>            |
|                                                                                                  |                  | 20   | 273 | 49.3  |                                             |
|                                                                                                  |                  | 20   | 298 | 44.3  |                                             |
| [Cu <sub>2</sub> (H <sub>2</sub> O) <sub>2</sub> (obaddi)]·4 H <sub>2</sub> O·2 DMA              | NOTT-125         | 1    | 273 | 28.6  | Alsmail et al., 2014 <sup>186</sup>         |
|                                                                                                  |                  | 1    | 298 | 15.4  |                                             |
|                                                                                                  |                  | 20   | 273 | 50.3  |                                             |
|                                                                                                  |                  | 20   | 298 | 48.3  |                                             |
| Cu <sub>4</sub> (TDTM)                                                                           | NOTT-140         | 1    | 293 | 11.7  | C. Tan et al., 2011 <sup>45</sup>           |
|                                                                                                  |                  | 20   | 293 | 47.7  |                                             |
|                                                                                                  |                  | 20   | 283 | 46.2  |                                             |
| Me <sub>2</sub> NH <sub>2</sub> ) <sub>1.75</sub> [In(btpc)] <sub>1.75</sub> (DMF) <sub>12</sub> | NOTT-202a        | 1    | 195 | 46.8  | Yang et al., 2012 <sup>187</sup>            |
| Cu <sub>3</sub> (btdi)(H <sub>2</sub> O) <sub>3</sub>                                            | NU-111           | 30   | 298 | 62.8  | Peng, Srinivas, et al., 2013 <sup>109</sup> |
| Zr(TBAPy) <sub>2</sub>                                                                           | NU-1000          | 1    | 298 | 10.7  | Farha et al., 2010 <sup>47</sup>            |
|                                                                                                  |                  | 40   | 298 | 67.1  |                                             |
| Cu <sub>3</sub> (TATB) <sub>2</sub> (catenated)                                                  | PCN-6            | 1    | 273 | 25.65 | Kim et al., 2011 <sup>63</sup>              |
|                                                                                                  |                  | 1    | 298 | 15.9  |                                             |
|                                                                                                  |                  | 30   | 298 | 53.9  |                                             |
| Cu <sub>3</sub> (btei)                                                                           | PCN-61           | 35   | 298 | 50.8  | Yuan et al., 2010 <sup>57</sup>             |
| Cu <sub>3</sub> (ntei)                                                                           | PCN-66           | 35   | 298 | 53.6  | Yuan et al., 2010 <sup>57</sup>             |
| Cu <sub>3</sub> (ptei)                                                                           | PCN-68           | 35   | 298 | 57.2  | Yuan et al., 2010 <sup>57</sup>             |
| Cu(NddIP) <sub>0.5</sub>                                                                         | PCN-88           | 1    | 273 | 23.8  | Li et al., 2013 <sup>188</sup>              |
|                                                                                                  |                  | 1    | 296 | 15.6  |                                             |
| Zn(PDAT)                                                                                         | PCN-123          | 1    | 295 | 3.9   | J. Park et al., 2012 <sup>189</sup>         |
| Zr(TCPP) <sub>2</sub>                                                                            | PCN-222, MOF-545 | 1    | 298 | 4.9   | Lv et al., 2018 <sup>190</sup>              |
|                                                                                                  |                  | 30   | 298 | 37.6  |                                             |
| Pd(2-pymo) <sub>2</sub>                                                                          |                  | 0.86 | 293 | 6.8   | Navarro et al., 2006 <sup>137</sup>         |
| Pd(F-pymo) <sub>2</sub>                                                                          |                  | 0.86 | 293 | 9.7   | Navarro et al., 2007 <sup>191</sup>         |
|                                                                                                  |                  | 1.2  | 273 | 13.5  |                                             |
| Sc <sub>2</sub> (BDC) <sub>3</sub>                                                               |                  | 1    | 303 | 3     | Miller et al., 2009 <sup>192</sup>          |
| (Me <sub>2</sub> NH <sub>2</sub> )[In(ABDC) <sub>2</sub> ]                                       | SHF-61           | 20   | 298 | 9.6   | Carrington et al., 2017 <sup>193</sup>      |

|                                                               |         |    |     |      |                                          |
|---------------------------------------------------------------|---------|----|-----|------|------------------------------------------|
| Zn <sub>3</sub> (NTB) <sub>2</sub>                            | SNU-3   | 1  | 195 | 22.9 | Suh, Cheon and Lee, 2007 <sup>194</sup>  |
|                                                               |         | 1  | 273 | 6.5  |                                          |
| Zn <sub>2</sub> (abtc)(DMF) <sub>2</sub>                      | SNU-4   | 1  | 195 | 35.5 | Lee et al., 2008 <sup>61</sup>           |
|                                                               |         | 1  | 273 | 17.3 |                                          |
| Cu <sub>2</sub> (abtc) <sub>3</sub>                           | SNU-5   | 1  | 195 | 52.9 | Lee et al., 2008 <sup>61</sup>           |
|                                                               |         | 1  | 273 | 27.8 |                                          |
| Cu <sub>2</sub> (BPhDC) <sub>2</sub> (4,4'-bpy)               | SNU-6   | 1  | 273 | 9.9  | Park and Suh, 2008 <sup>195</sup>        |
| Zn <sub>2</sub> (BPhDC) <sub>2</sub> (bpy)                    | SNU-9   | 30 | 298 | 23   | Park and Suh, 2010 <sup>196</sup>        |
| Co <sub>2</sub> (MTB)                                         | SNU-15  | 1  | 273 | 6.5  | Cheon and Suh, 2009 <sup>197</sup>       |
| Cu <sub>2</sub> (TCM)                                         | SNU-21S | 1  | 298 | 10   | Kim and Suh, 2011 <sup>63</sup>          |
| Zn <sub>2</sub> (TCPBDA)(H <sub>2</sub> O) <sub>2</sub>       | SNU-30  | 1  | 195 | 31.6 | Park, Cheon and Suh, 2010 <sup>62</sup>  |
|                                                               |         | 1  | 273 | 10.3 |                                          |
|                                                               |         | 1  | 298 | 4.9  |                                          |
|                                                               |         | 50 | 298 | 18   |                                          |
| Zn <sub>2</sub> (TCPBDA)(bpta)                                | SNU-31  | 1  | 195 | 14.6 | Park, Cheon and Suh, 2010 <sup>62</sup>  |
|                                                               |         | 1  | 273 | 5    |                                          |
|                                                               |         | 1  | 298 | 2.6  |                                          |
|                                                               |         | 40 | 298 | 8.8  |                                          |
| Cu <sub>2</sub> (bdcppi)                                      | SNU-50  | 1  | 195 | 47.2 | Prasad, Hong and Suh, 2010 <sup>64</sup> |
|                                                               |         | 1  | 273 | 19.1 |                                          |
|                                                               |         | 1  | 298 | 13.7 |                                          |
|                                                               |         | 46 | 298 | 42.9 |                                          |
| Zn <sub>4</sub> O(CEB) <sub>2</sub>                           | SNU-71  | 1  | 195 | 36.7 | Prasad and Suh, 2012 <sup>114</sup>      |
|                                                               |         | 1  | 298 | 4.2  |                                          |
| Ni <sub>2</sub> (CYC-2C-CYC)(bptc)                            | SNU-M10 | 1  | 195 | 19.5 | Choi and Suh, 2009 <sup>198</sup>        |
|                                                               |         | 1  | 273 | 12.7 |                                          |
|                                                               |         | 1  | 298 | 8.5  |                                          |
| Ni <sub>2</sub> (CYC-4C-CYC)(bptc)                            | SNU-M11 | 1  | 195 | 19.5 | Choi and Suh, 2009 <sup>198</sup>        |
| [Zn <sub>4</sub> O(bdc) <sub>3</sub> ].(ZnO) <sub>0.125</sub> | SUMOF-2 | 1  | 273 | 15.9 | Yao et al., 2012 <sup>199</sup>          |
| Zn <sub>4</sub> O(NDC) <sub>3</sub>                           | SUMOF-3 | 1  | 273 | 13   | Yao et al., 2012 <sup>199</sup>          |

|                          |               |    |     |      |                                                             |
|--------------------------|---------------|----|-----|------|-------------------------------------------------------------|
| Zn4O(bdc)2(bpdc)(H2O)    | SUMOF-4       | 1  | 273 | 13.7 | Yao et al., 2012 <sup>199</sup>                             |
| Cu(bpy)2(EDS)            | TMOF-1        | 1  | 200 | 22.9 | Zhang et al., 2016 <sup>200</sup>                           |
|                          |               | 1  | 273 | 9    |                                                             |
|                          |               | 1  | 298 | 5.8  |                                                             |
|                          |               | 1  | 308 | 4.9  |                                                             |
| Zn2(obb)2(bppta)         | TMU-22        | 1  | 203 | 24.1 | Safarifard et al., 2016 <sup>201</sup>                      |
| Zn2(obb)2(bpfm)          | TMU-24        | 1  | 203 | 21.7 | Safarifard et al., 2016 <sup>201</sup>                      |
| Zr6O4(OH)4(bpdc)12       | UiO(bpdc)     | 20 | 303 | 42.1 | Li et al., 2014 <sup>202</sup>                              |
| Zn4O(BDC)(BTB)4/3        | UMCM-1        | 1  | 298 | 3.8  | Yazaydm et al., 2009 <sup>203</sup>                         |
|                          |               | 24 | 298 | 50.8 | Mu, Schoenecker and Walton, 2010 <sup>204</sup>             |
| Cu3(BPT)2                | UMCM-150      | 1  | 298 | 10.2 | Yazaydm et al., 2009 <sup>203</sup>                         |
| Ni2(BDC)2(DABCO)         | USO-2-Ni      | 1  | 298 | 10   | Arstad et al., 2008 <sup>205</sup>                          |
| Ni2(2-amino-BDC)2(DABCO) | USO-2-Ni-A    | 1  | 298 | 14   | Arstad et al., 2008 <sup>205</sup>                          |
| In(OH)(BDC)              | USO-3-In-A    | 1  | 298 | 8    | Arstad et al., 2008 <sup>205</sup>                          |
| Al(OH)(Sbpdcc)           | USTC-253      | 1  | 273 | 14   | Jiang et al., 2015 <sup>206</sup>                           |
|                          |               | 1  | 298 | 8.5  |                                                             |
| Al(OH)(Sbpdcc)(TFA)      | USTC-253- TFA | 1  | 273 | 21.2 | Jiang et al., 2015 <sup>206</sup>                           |
|                          |               | 1  | 298 | 11.3 |                                                             |
| Cu(BDC-OH)(4,4'-bipy)    | UTSA-15a      | 1  | 296 | 5.1  | Z. Chen, Xiang, Hadi D. Arman, et al., 2011a <sup>207</sup> |
| Cu3(BHB)                 | UTSA-20a      | 1  | 296 | 17   | Guo et al., 2011 <sup>69</sup>                              |
| Zn(BDC-OH)(DABCO)0.5     | UTSA-25a      | 1  | 296 | 12   | Z. Chen, Xiang, Hadi D Arman, et al., 2011b <sup>208</sup>  |
| Zn4(TIPAB)(DMA)4         | UTSA-33a      | 1  | 273 | 8.9  | He, Zhang, Xiang, Fronczek, et al., 2012 <sup>209</sup>     |
| Zn2(btbb)(diPyNI)        | YO-MOF        | 1  | 273 | 14.4 | Mulfort et al., 2010 <sup>210</sup>                         |
|                          |               | 1  | 298 | 4.5  |                                                             |
| Zn(MeIm)2                | ZIF-8         | 1  | 298 | 4.3  | Yazaydm et al., 2009 <sup>203</sup>                         |
| Zn(nIm)(bIm)             | ZIF-68        | 1  | 298 | 6.4  | Banerjee et al., 2009 <sup>211</sup>                        |
| Zn(nIm)(cbIm)            | ZIF-69        | 1  | 298 | 7.9  | Banerjee et al., 2009 <sup>211</sup>                        |
| Zn(nIm)(Im)              | ZIF-70        | 1  | 298 | 4.43 | Banerjee et al., 2009 <sup>211</sup>                        |
| Zn(nbIm)(nIm)            | ZIF-78        | 2  | 298 | 9.52 | Banerjee et al., 2009 <sup>211</sup>                        |

|                                                                                    |         |     |     |      |                                           |
|------------------------------------------------------------------------------------|---------|-----|-----|------|-------------------------------------------|
| Zn(nIm)(mbIm)                                                                      | ZIF-79  | 1.1 | 298 | 5.9  | Banerjee et al., 2009 <sup>211</sup>      |
| Zn(nIm)(cnIm)                                                                      | ZIF-82  | 1   | 298 | 7.84 | Banerjee et al., 2009 <sup>211</sup>      |
| Zn(almeIm)                                                                         | ZIF-93  | 1   | 298 | 6.7  | Morris et al., 2010 <sup>212</sup>        |
| Zn(cyamIm)                                                                         | ZIF-96  | 1   | 298 | 8.5  | Morris et al., 2010 <sup>212</sup>        |
| Cu <sub>2</sub> (BTADD)(H <sub>2</sub> O) <sub>2</sub>                             | ZJNU-40 | 1   | 273 | 24.9 | Song et al., 2014 <sup>213</sup>          |
|                                                                                    |         | 1   | 296 | 16.3 |                                           |
| [Cu <sub>2</sub> (qdip)(H <sub>2</sub> O) <sub>2</sub> ] <sub>3</sub> DMF·2EtOH    | ZJNU-43 | 1   | 273 | 24.9 | Song, Hu, et al., 2015 <sup>214</sup>     |
|                                                                                    |         | 1   | 296 | 17.2 |                                           |
| [Cu <sub>2</sub> (qodip)(H <sub>2</sub> O) <sub>2</sub> ] <sub>3</sub> DMF·3MeOH Z | ZJNU-45 | 1   | 273 | 23.5 | Song, Hu, et al., 2015 <sup>214</sup>     |
|                                                                                    |         | 1   | 296 | 16.1 |                                           |
| Zn(BDC-NH <sub>2</sub> )(dabco)0.5                                                 |         | 1   | 298 | 8.8  | Zhao et al., 2011 <sup>215</sup>          |
| Zn(BDC-OH)(dabco)0.5                                                               |         | 1   | 298 | 11.7 | Zhao et al., 2011 <sup>215</sup>          |
| Zn(BPZNO <sub>2</sub> )                                                            |         | 1.2 | 298 | 18   | Mosca et al., 2018 <sup>216</sup>         |
| Zn(dtp)                                                                            |         | 1   | 195 | 14   | J.-R. Li et al., 2008 <sup>217</sup>      |
| Zn(MIai)                                                                           |         | 1   | 298 | 7.9  | Debatin et al., 2010 <sup>81</sup>        |
| Zn <sub>2</sub> (2,5-BME-bdc) <sub>2</sub> (dabco)                                 |         | 1   | 195 | 16.8 | Henke et al., 2012 <sup>218</sup>         |
| Zn <sub>2</sub> (BDC) <sub>2</sub> (dabco)                                         |         | 1   | 294 | 8.1  | Mishra et al., 2012 <sup>219</sup>        |
|                                                                                    |         | 25  | 294 | 37.3 |                                           |
| Zn <sub>2</sub> (BME-bdc) <sub>2</sub> -(bipy)                                     |         | 1   | 195 | 23.6 | Henke and Fischer, 2011 <sup>220</sup>    |
|                                                                                    |         | 1   | 273 | 9.2  |                                           |
|                                                                                    |         | 1   | 298 | 5.56 |                                           |
| Zn <sub>2</sub> (BMOE-bdc) <sub>2</sub> (dabco)                                    |         | 1   | 195 | 25.4 | Henke et al., 2010 <sup>221</sup>         |
| Zn <sub>2</sub> (BMOP-bdc) <sub>2</sub> (dabco)                                    |         | 1   | 195 | 8.6  | Henke et al., 2010 <sup>221</sup>         |
| Zn <sub>2</sub> (bpdc) <sub>2</sub> (bpe)                                          |         | 1   | 273 | 7.3  | J. Zhang et al., 2010 <sup>222</sup>      |
|                                                                                    |         | 1   | 298 | 4.7  |                                           |
| Zn <sub>2</sub> (DB-bdc) <sub>2</sub> (dabco)                                      |         | 1   | 195 | 9.9  | Henke et al., 2012 <sup>218</sup>         |
| Zn <sub>2</sub> (MOE-bdc) <sub>2</sub> (dabco)                                     |         | 1   | 195 | 30.7 | Henke et al., 2010 <sup>221</sup>         |
| Zn <sub>2</sub> (NDC) <sub>2</sub> (diPyNI)                                        |         | 1   | 298 | 5.8  | Bae et al., 2011 <sup>223</sup>           |
| Zn <sub>2</sub> (ox)(atz) <sub>2</sub>                                             |         | 1.2 | 273 | 16.1 | Vaidhyanathan et al., 2009 <sup>224</sup> |
|                                                                                    |         | 1.2 | 293 | 14.2 |                                           |

|                                                                                  |           |     |     |      |                                                   |
|----------------------------------------------------------------------------------|-----------|-----|-----|------|---------------------------------------------------|
| Zn <sub>4</sub> (OH) <sub>2</sub> (BTC) <sub>2</sub>                             |           | 1   | 295 | 6.7  | Z. Zhang et al., 2010 <sup>225</sup>              |
| Zn <sub>4</sub> O(BMOE-bdc) <sub>3</sub>                                         |           | 1   | 195 | 18.1 | Henke et al., 2010 <sup>221</sup>                 |
| Zn <sub>4</sub> O(BMOP-bdc) <sub>3</sub>                                         |           | 1   | 195 | 11.9 | Henke et al., 2010 <sup>221</sup>                 |
| Zn <sub>4</sub> O(FMA) <sub>3</sub>                                              |           | 2   | 296 | 3.8  | Xiang et al., 2012 <sup>138</sup>                 |
| Zn <sub>4</sub> O(MOE-bdc) <sub>3</sub>                                          |           | 1   | 195 | 47   | Henke et al., 2010 <sup>221</sup>                 |
| [Zn <sub>4</sub> (BDC) <sub>4</sub> (BPDA) <sub>4</sub> ]-5DMF·3H <sub>2</sub> O | Zn-bpda   | 1   | 298 | 7.5  | Lee et al., 2013 <sup>226</sup>                   |
|                                                                                  |           | 35  | 298 | 13.2 |                                                   |
| Zn <sub>2</sub> (dobdc)                                                          | Zn-MOF-74 | 0.1 | 296 | 5.4  | Caskey, Wong-Foy and Matzger, 2008 <sup>132</sup> |
|                                                                                  |           | 1   | 296 | 19.5 |                                                   |
| Zn(5-AT) <sub>2</sub>                                                            | ZTF-1     | 1   | 273 | 19.8 | Panda et al., 2011 <sup>80</sup>                  |

Table S4: Individual coefficient of determination values for each fold in the 10 runs

| Run | Fold number |      |      |      |      |      |      |      |      |      |
|-----|-------------|------|------|------|------|------|------|------|------|------|
|     | 1           | 2    | 3    | 4    | 5    | 6    | 7    | 8    | 9    | 10   |
| 1   | 0.91        | 0.87 | 0.87 | 0.92 | 0.87 | 0.87 | 0.92 | 0.86 | 0.90 | 0.85 |
| 2   | 0.86        | 0.88 | 0.89 | 0.90 | 0.84 | 0.86 | 0.86 | 0.92 | 0.84 | 0.92 |
| 3   | 0.86        | 0.86 | 0.93 | 0.91 | 0.90 | 0.83 | 0.92 | 0.90 | 0.87 | 0.83 |
| 4   | 0.85        | 0.87 | 0.89 | 0.91 | 0.92 | 0.82 | 0.87 | 0.87 | 0.89 | 0.88 |
| 5   | 0.89        | 0.90 | 0.93 | 0.83 | 0.89 | 0.88 | 0.87 | 0.85 | 0.84 | 0.92 |
| 6   | 0.89        | 0.90 | 0.82 | 0.94 | 0.86 | 0.89 | 0.86 | 0.87 | 0.89 | 0.85 |
| 7   | 0.88        | 0.87 | 0.87 | 0.91 | 0.91 | 0.89 | 0.79 | 0.86 | 0.90 | 0.87 |
| 8   | 0.89        | 0.84 | 0.92 | 0.86 | 0.88 | 0.88 | 0.88 | 0.85 | 0.86 | 0.88 |
| 9   | 0.79        | 0.91 | 0.87 | 0.87 | 0.92 | 0.90 | 0.82 | 0.91 | 0.90 | 0.86 |
| 10  | 0.88        | 0.89 | 0.83 | 0.81 | 0.88 | 0.88 | 0.87 | 0.89 | 0.91 | 0.91 |



## Hyperparameters for other machine learning models

### Linear Regression

This was fitted using the “fitrlinear” function in MATLAB 2020. All other parameters that are not stated are set to their default values.

Lambda = 0.048818

Learner type = Least Squares

Regularisation = Ridge

### Decision Trees

This was fitted using the “fitrtrees” function in MATLAB 2020. All other parameters that are not stated are set at their default values.

Minimum Leaf size = 3

Maximum number of splits = 195

### Support Vector Mechanism

This was fitted using the “fitrsvm” function in MATLAB 2020. All other parameters that are not stated are set at their default values.

Box Constraint = 0.11404

Epsilon = 0.18408

Kernel Function = Linear

Standardize data = False

## References for uptake data

- (1) Sumida, K.; Hill, M. R.; Horike, S.; Dailly, A.; Long, J. R. Synthesis and Hydrogen Storage Properties of Be<sub>12</sub>(OH)<sub>12</sub>(1, 3, 5-Benzenetribenzoate) 4. *J. Am. Chem. Soc.* **2009**, *131*, 15120–15121.
- (2) Chun, H.; Kim, D.; Dybtsev, D. N.; Kim, K. Metal–Organic Replica of Fluorite Built with an Eight-Connecting Tetranuclear Cadmium Cluster and a Tetrahedral Four-Connecting Ligand. *Angew. Chemie* **2004**, *116*, 989–992.
- (3) Choi, H. J.; Dinca, M.; Long, J. R. Broadly Hysteretic H<sub>2</sub> Adsorption in the Microporous Metal–Organic Framework Co(1, 4-Benzenedipyrazolate). *J. Am. Chem. Soc.* **2008**, *130*, 7848–7850.
- (4) Li, Y.; Xie, L.; Liu, Y.; Yang, R.; Li, X. Favorable Hydrogen Storage Properties of M(HBTC)(4,4'-Bipy)·3DMF (M = Ni and Co). *Inorg. Chem.* **2008**, *47*, 10372–10377. <https://doi.org/10.1021/ic800919k>.
- (5) Myunghyun Paik Suh, Hye Jeong Park, T. K. P. Hydrogen Storage in Metal Organic Frameworks. *Chem. Rev.* **2012**, *112*, 782–835.
- (6) Lee, J. Y.; Pan, L.; Kelly, S. P.; Jagiello, J.; Emge, T. J.; Li, J. Achieving High Density of Adsorbed Hydrogen in Microporous Metal Organic Frameworks. *Adv. Mater.* **2005**, *17*, 2703–2706. <https://doi.org/10.1002/adma.200500867>.
- (7) Chun, H.; Jung, H.; Koo, G.; Jeong, H.; Kim, D.-K. Efficient Hydrogen Sorption in 8-Connected MOFs Based on Trinuclear Pinwheel Motifs. *Inorg. Chem.* **2008**, *47*, 5355–5359.
- (8) Liao, J. H.; Chen, W. T.; Tsai, C. S.; Wang, C. C. Characterization, Adsorption Properties, Metal Ion-Exchange and Crystal-to-Crystal Transformation of Cd<sub>3</sub>[(Cd<sub>4</sub>Cl)<sub>3</sub>(BTT)<sub>8</sub>(H<sub>2</sub>O)<sub>12</sub>]<sub>2</sub> Framework, Where BTT<sup>3-</sup> = 1,3,5-Benzenetristetrazolate. *CrystEngComm* **2013**, *15*, 3377–3384. <https://doi.org/10.1039/c3ce27063g>.
- (9) Sumida, K.; Her, J.-H.; Dinca, M.; Murray, L. J.; Schloss, J. M.; Pierce, C. J.; Thompson, B. A.; FitzGerald, S. A.; Brown, C. M.; Long, J. R. Neutron Scattering and Spectroscopic Studies of Hydrogen Adsorption in Cr<sub>3</sub>(BTC) 2 A Metal–Organic Framework with Exposed Cr<sup>2+</sup> Sites. *J. Phys. Chem. C* **2011**, *115*, 8414–8421.
- (10) Yang, W.; Lin, X.; Jia, J.; Blake, A. J.; Wilson, C.; Hubberstey, P.; Champness, N. R.; Schröder, M. A Biporous Coordination Framework with High H<sub>2</sub> Storage Density. *Chem. Commun.* **2008**, 359–361.
- (11) Liu, X.; Oh, M.; Lah, M. S. Adsorbate Selectivity of Isoreticular Microporous Metal–Organic Frameworks with Similar Static Pore Dimensions. *Cryst. Growth Des.* **2011**, *11*, 5064–5071.
- (12) Nouar, F.; Eubank, J. F.; Bousquet, T.; Wojtas, L.; Zaworotko, M. J.; Eddaoudi, M. Supramolecular Building Blocks (SBBs) for the Design and Synthesis of Highly Porous Metal–Organic Frameworks. *J. Am. Chem. Soc.* **2008**, *130*, 1833–1835. <https://doi.org/10.1021/ja710123s>.

- (13) Lee, J. Y.; Olson, D. H.; Pan, L.; Emge, T. J.; Li, J. Microporous Metal-Organic Frameworks with High Gas Sorption and Separation Capacity. *Adv. Funct. Mater.* **2007**, *17*, 1255–1262. <https://doi.org/10.1002/adfm.200600944>.
- (14) Zheng, B.; Liang, Z.; Li, G.; Huo, Q.; Liu, Y. Synthesis, Structure, and Gas Sorption Studies of a Three-Dimensional Metal-Organic Framework with NbO Topology. *Cryst. Growth Des.* **2010**, *10*, 3405–3409. <https://doi.org/10.1021/cg100046j>.
- (15) García-Holley, P.; Schweitzer, B.; Islamoglu, T.; Liu, Y.; Lin, L.; Rodriguez, S.; Weston, M. H.; Hupp, J. T.; Gómez-Gualdrón, D. A.; Yildirim, T.; Farha, O. K. Benchmark Study of Hydrogen Storage in Metal-Organic Frameworks under Temperature and Pressure Swing Conditions. *ACS Energy Lett.* **2018**, *3*, 748–754. <https://doi.org/10.1021/acsenergylett.8b00154>.
- (16) Maity, K.; Karan, C. K.; Biradha, K. Porous Metal-Organic Polyhedral Framework Containing Cuboctahedron Cages as SBUs with High Affinity for H<sub>2</sub> and CO<sub>2</sub> Sorption: A Heterogeneous Catalyst for Chemical Fixation of CO<sub>2</sub>. *Chem. - A Eur. J.* **2018**, *24*, 10988–10993. <https://doi.org/10.1002/chem.201802829>.
- (17) Jia, J.; Lin, X.; Wilson, C.; Blake, A. J.; Champness, N. R.; Hubberstey, P.; Walker, G.; Cussen, E. J.; Schröder, M. Twelve-Connected Porous Metal-Organic Frameworks with High H<sub>2</sub> Adsorption. *Chem. Commun.* **2007**, *3*, 840–842. <https://doi.org/10.1039/b614254k>.
- (18) Choi, S. B.; Seo, M. J.; Cho, M.; Kim, Y.; Jin, M. K.; Jung, D. Y.; Choi, J. S.; Ahn, W. S.; Rowsell, J. L. C.; Kim, J. A Porous and Interpenetrated Metal-Organic Framework Comprising Tetranuclear Iron III-Oxo Clusters and Tripodal Organic Carboxylates and Its Implications for (3,8)-Coordinated Networks. *Cryst. Growth Des.* **2007**, *7*, 2290–2293. <https://doi.org/10.1021/cg070640e>.
- (19) Han, D.; Jiang, F. L.; Wu, M. Y.; Chen, L.; Chen, Q. H.; Hong, M. C. A Non-Interpenetrated Porous Metal-Organic Framework with High Gas-Uptake Capacity. *Chem. Commun.* **2011**, *47*, 9861–9863. <https://doi.org/10.1039/c1cc12858b>.
- (20) Dincă, M.; Han, W. S.; Liu, Y.; Dailly, A.; Brown, C. M.; Long, J. R. Observation of Cu<sup>2+</sup>-H<sub>2</sub> Interactions in a Fully Desolvated Socialite-Type Metal-Organic Framework. *Angew. Chemie - Int. Ed.* **2007**, *46*, 1419–1422. <https://doi.org/10.1002/anie.200604362>.
- (21) Cheng, C.; Yang, G. S.; Yan, L. H.; Wang, X.; Jiang, C. J.; Li, N.; Su, Z. M. Improved Moisture Resistance of a New Zn<sub>4</sub>O-Based Metal-Organic Framework by Introducing Hydrophobic Phenyl Groups. *Inorg. Chem. Commun.* **2018**, *93*, 25–28. <https://doi.org/10.1016/j.inoche.2018.04.026>.
- (22) Wong-Foy, A. G.; Matzger, A. J.; Yaghi, O. M. Exceptional H<sub>2</sub> Saturation Uptake in Microporous Metal-Organic Frameworks. *J. Am. Chem. Soc.* **2006**, *128*, 3494–3495. <https://doi.org/10.1021/ja058213h>.
- (23) Rowsell, J. L. C.; Millward, A. R.; Park, K. S.; Yaghi, O. M. Hydrogen Sorption in Functionalized Metal-Organic Frameworks. *J. Am. Chem. Soc.* **2004**, *126*, 5666–5667. <https://doi.org/10.1021/ja049408c>.
- (24) Rowsell, J. L. C.; Yaghi, O. M. Effects of Functionalization, Catenation, and Variation of the Metal Oxide and Organic Linking Units on the Low-Pressure Hydrogen Adsorption Properties of Metal-Organic Frameworks. *J. Am. Chem. Soc.* **2006**, *128*, 1304–1315.

<https://doi.org/10.1021/ja056639q>.

- (25) Fang, Q.-R.; Zhu, G.-S.; Jin, Z.; Ji, Y.-Y.; Ye, J.-W.; Xue, M.; Yang, H.; Wang, Y.; Qiu, S.-L. Mesoporous Metal–Organic Framework with Rare Etb Topology for Hydrogen Storage and Dye Assembly. *Angew. Chemie* **2007**, *119*, 6758–6762. <https://doi.org/10.1002/ange.200700537>.
- (26) Yan, Y.; Da Silva, I.; Blake, A. J.; Dailly, A.; Manuel, P.; Yang, S.; Schröder, M. High Volumetric Hydrogen Adsorption in a Porous Anthracene-Decorated Metal–Organic Framework. *Inorg. Chem.* **2018**, *57*, 12050–12055. <https://doi.org/10.1021/acs.inorgchem.8b01607>.
- (27) Sumida, K.; Brown, C. M.; Herm, Z. R.; Chavan, S.; Bordiga, S.; Long, J. R. Hydrogen Storage Properties and Neutron Scattering Studies of Mg<sub>2</sub>(Dobdc)—a Metal–Organic Framework with Open Mg<sup>2+</sup> Adsorption Sites. *Chem. Commun.* **2011**, *47*, 1157–1159. <https://doi.org/10.1039/c0cc03453c>.
- (28) Férey, G.; Latroche, M.; Serre, C.; Millange, F.; Loiseau, T.; Percheron-Guégan, A. Hydrogen Adsorption in the Nanoporous Metal-Benzenedicarboxylate M(OH)(O<sub>2</sub>C-C<sub>6</sub>H<sub>4</sub>-CO<sub>2</sub>)(M = Al<sup>3+</sup>, Cr<sup>3+</sup>), MIL-53. *Chem. Commun.* **2003**, *3*, 2976–2977. <https://doi.org/10.1039/b308903g>.
- (29) Latroche, M.; Surblé, S.; Serre, C.; Mellot-Draznieks, C.; Llewellyn, P. L.; Lee, J.-H.; Chang, J.-S.; Jung, S. H.; Férey, G. Hydrogen Storage in the Giant-Pore Metal–Organic Frameworks MIL-100 and MIL-101. *Angew. Chemie* **2006**, *118*, 8407–8411. <https://doi.org/10.1002/ange.200600105>.
- (30) Ren, J.; Musyoka, N. M.; Langmi, H. W.; Segakweng, T.; North, B. C.; Mathe, M.; Kang, X. Modulated Synthesis of Chromium-Based Metal–Organic Framework (MIL-101) with Enhanced Hydrogen Uptake. *Int. J. Hydrogen Energy* **2014**, *39*, 12018–12023. <https://doi.org/10.1016/j.ijhydene.2014.06.019>.
- (31) Panella, B.; Hirscher, M.; Pütter, H.; Müller, U. Hydrogen Adsorption in Metal–Organic Frameworks: Cu-MOFs and Zn-MOFs Compared. *Adv. Funct. Mater.* **2006**, *16*, 520–524.
- (32) Sabo, M.; Henschel, A.; Fröde, H.; Klemm, E.; Kaskel, S. Solution Infiltration of Palladium into MOF-5: Synthesis, Physisorption and Catalytic Properties. *J. Mater. Chem.* **2007**, *17*, 3827–3832. <https://doi.org/10.1039/b706432b>.
- (33) Liu, Y.; Kabbour, H.; Brown, C. M.; Neumann, D. A.; Ahn, C. C. Increasing the Density of Adsorbed Hydrogen with Coordinatively Unsaturated Metal Centers in Metal–Organic Frameworks. *Langmuir* **2008**, *24*, 4772–4777. <https://doi.org/10.1021/la703864a>.
- (34) Furukawa, H.; Ko, N.; Go, Y. B.; Aratani, N.; Choi, S. B.; Choi, E.; Yazaydin, A. Ö.; Snurr, R. Q.; O’Keeffe, M.; Kim, J.; Yaghi, O. M. Ultrahigh Porosity in Metal–Organic Frameworks. *Science (80-. )*. **2010**, *329*, 424–428. <https://doi.org/10.1126/science.1192160>.
- (35) Chen, B.; Ockwig, N. W.; Millward, A. R.; Contreras, D. S.; Yaghi, O. M. High H<sub>2</sub> Adsorption in a Microporous Metal–Organic Framework with Open Metal Sites. *Angew. Chemie - Int. Ed.* **2005**, *44*, 4745–4749. <https://doi.org/10.1002/anie.200462787>.
- (36) Lin, X.; Telepeni, I.; Blake, A. J.; Dailly, A.; Brown, C. M.; Simmons, J. M.; Zoppi, M.; Walker, G. S.; Thomas, K. M.; Mays, T. J.; Hubberstey, P.;

- Champness, N. R.; Schröder, M. High Capacity Hydrogen Adsorption in Cu(II) Tetracarboxylate Framework Materials: The Role of Pore Size, Ligand Functionalization, and Exposed Metal Sites. *J. Am. Chem. Soc.* **2009**, *131*, 2159–2171. <https://doi.org/10.1021/ja806624j>.
- (37) Barman, S.; Furukawa, H.; Blacque, O.; Venkatesan, K.; Yaghi, O. M.; Berke, H. Azulene Based Metal-Organic Frameworks for Strong Adsorption of H<sub>2</sub>. *Chem. Commun.* **2010**, *46*, 7981–7983. <https://doi.org/10.1039/c0cc02589e>.
- (38) Xia, L.; Liu, Q.; Wang, F.; Lu, J. Improving the Hydrogen Storage Properties of Metal-Organic Framework by Functionalization. *J. Mol. Model.* **2016**, *22*. <https://doi.org/10.1007/s00894-016-3129-3>.
- (39) Dietzel, P. D. C.; Panella, B.; Hirscher, M.; Blom, R.; Fjellvåg, H. Hydrogen Adsorption in a Nickel Based Coordination Polymer with Open Metal Sites in the Cylindrical Cavities of the Desolvated Framework. *Chem. Commun.* **2006**, *1*, 959–961. <https://doi.org/10.1039/b515434k>.
- (40) Zheng, B.; Yun, R.; Bai, J.; Lu, Z.; Du, L.; Li, Y. Expanded Porous MOF-505 Analogue Exhibiting Large Hydrogen Storage Capacity and Selective Carbon Dioxide Adsorption. *Inorg. Chem.* **2013**, *52*, 2823–2829. <https://doi.org/10.1021/ic301598n>.
- (41) Yang, S.; Lin, X.; Dailly, A.; Blake, A. J.; Hubberstey, P.; Champness, N. R.; Schröder, M. Enhancement of H<sub>2</sub> Adsorption in Coordination Framework Materials by Use of Ligand Curvature. *Chem. - A Eur. J.* **2009**, *15*, 4829–4835. <https://doi.org/10.1002/chem.200802292>.
- (42) Yan, Y.; Lin, X.; Yang, S.; Blake, A. J.; Dailly, A.; Champness, N. R.; Hubberstey, P.; Schröder, M. Exceptionally High H<sub>2</sub> Storage by a Metal-Organic Polyhedral Framework. *Chem. Commun.* **2009**, 1025–1027. <https://doi.org/10.1039/b900013e>.
- (43) Yan, Y.; Blake, A. J.; Lewis, W.; Barnett, S. A.; Dailly, A.; Champness, N. R.; Schröder, M. Modifying Cage Structures in Metal-Organic Polyhedral Frameworks for H<sub>2</sub> Storage. *Chem. - A Eur. J.* **2011**, *17*, 11162–11170. <https://doi.org/10.1002/chem.201101341>.
- (44) Yan, Y.; Yang, S.; Blake, A. J.; Lewis, W.; Poirier, E.; Barnett, S. A.; Champness, N. R.; Schröder, M. A Mesoporous Metal-Organic Framework Constructed from a Nanosized C<sub>3</sub>-Symmetric Linker and [Cu<sub>24</sub>(Isophthalate)<sub>24</sub>] Cuboctahedra. *Chem. Commun.* **2011**, *47*, 9995–9997. <https://doi.org/10.1039/c1cc13170b>.
- (45) Tan, C.; Yang, S.; Champness, N. R.; Lin, X.; Blake, A. J.; Lewis, W.; Schröder, M. High Capacity Gas Storage by a 4,8-Connected Metal-Organic Polyhedral Framework. *Chem. Commun.* **2011**, *47*, 4487–4489. <https://doi.org/10.1039/c1cc10378d>.
- (46) Ibarra, I. A.; Yang, S.; Lin, X.; Blake, A. J.; Rizkallah, P. J.; Nowell, H.; Allan, D. R.; Champness, N. R.; Hubberstey, P.; Schröder, M. Highly Porous and Robust Scandium-Based Metal-Organic Frameworks for Hydrogen Storage. *Chem. Commun.* **2011**, *47*, 8304–8306. <https://doi.org/10.1039/c1cc11168j>.
- (47) Farha, O. K.; Yazaydin, A. Ö.; Eryazici, I.; Malliakas, C. D.; Hauser, B. G.; Kanatzidis, M. G.; Nguyen, S. T.; Snurr, R. Q.; Hupp, J. T. De Novo Synthesis of a Metal-Organic Framework Material Featuring Ultrahigh Surface Area and Gas Storage Capacities. *Nat. Chem.* **2010**, *2*, 944–948. <https://doi.org/10.1038/nchem.834>.

- (48) Yan, Y.; Yang, S.; Blake, A. J.; Schröder, M. Studies on Metal-Organic Frameworks of Cu(II) with Isophthalate Linkers for Hydrogen Storage. *Acc. Chem. Res.* **2014**, *47*, 296–307. <https://doi.org/10.1021/ar400049h>.
- (49) Gómez-Gualdrón, D. A.; Wang, T. C.; García-Holley, P.; Sawelewa, R. M.; Argueta, E.; Snurr, R. Q.; Hupp, J. T.; Yildirim, T.; Farha, O. K. Understanding Volumetric and Gravimetric Hydrogen Adsorption Trade-off in Metal-Organic Frameworks. *ACS Appl. Mater. Interfaces* **2017**, *9*, 33419–33428. <https://doi.org/10.1021/acsami.7b01190>.
- (50) Sun, D.; Ma, S.; Ke, Y.; Collins, D. J.; Zhou, H. C. An Interweaving MOF with High Hydrogen Uptake. *J. Am. Chem. Soc.* **2006**, *128*, 3896–3897. <https://doi.org/10.1021/ja058777l>.
- (51) Ma, S.; Eckert, J.; Forster, P. M.; Ji, W. Y.; Young, K. H.; Chang, J. S.; Collier, C. D.; Parise, J. B.; Zhou, H. C. Further Investigation of the Effect of Framework Catenation on Hydrogen Uptake in Metal - Organic Frameworks. *J. Am. Chem. Soc.* **2008**, *130*, 15896–15902. <https://doi.org/10.1021/ja803492q>.
- (52) Wang, X. Sen; Shengqian, M.; Rauch, K.; Simmons, J. M.; Yuan, D.; Wang, X.; Yildirim, T.; Cole, W. C.; López, J. J.; De Meijere, A.; Zhou, H. C. Metal-Organic Frameworks Based on Double-Bond-Coupled Di-Isophthalate Linkers with High Hydrogen and Methane Uptakes. *Chem. Mater.* **2008**, *20*, 3145–3152. <https://doi.org/10.1021/cm800403d>.
- (53) Ma, S.; Simmons, J. M.; Sun, D.; Yuan, D.; Zhou, H. C. Porous Metal-Organic Frameworks Based on an Anthracene Derivative: Syntheses, Structure Analysis, and Hydrogen Sorption Studies. *Inorg. Chem.* **2009**, *48*, 5263–5268. <https://doi.org/10.1021/ic900217t>.
- (54) Sun, D.; Ma, S.; Simmons, J. M.; Li, J. R.; Yuan, D.; Zhou, H. C. An Unusual Case of Symmetry-Preserving Isomerism. *Chem. Commun.* **2010**, *46*, 1329–1331. <https://doi.org/10.1039/b920995f>.
- (55) Zhuang, W.; Ma, S.; Wang, X. Sen; Yuan, D.; Li, J. R.; Zhao, D.; Zhou, H. C. Introduction of Cavities up to 4 Nm into a Hierarchically-Assembled Metal-Organic Framework Using an Angular, Tetratopic Ligand. *Chem. Commun.* **2010**, *46*, 5223–5225. <https://doi.org/10.1039/c0cc00779j>.
- (56) Zhao, D.; Yuan, D.; Yakovenko, A.; Zhou, H. C. A NbO-Type Metal-Organic Framework Derived from a Polyyne-Coupled Di-Isophthalate Linker Formed in Situ. *Chem. Commun.* **2010**, *46*, 4196–4198. <https://doi.org/10.1039/c002767g>.
- (57) Yuan, D.; Zhao, D.; Sun, D.; Zhou, H.-C. An Isoreticular Series of Metal-Organic Frameworks with Dendritic Hexacarboxylate Ligands and Exceptionally High Gas-Uptake Capacity. *Angew. Chemie* **2010**, *122*, 5485–5489. <https://doi.org/10.1002/ange.201001009>.
- (58) Zhang, P.; Li, B.; Zhao, Y.; Meng, X.; Zhang, T. A Novel (3,36)-Connected and Self-Interpenetrated Metal-Organic Framework with High Thermal Stability and Gas-Sorption Capabilities. *Chem. Commun.* **2011**, *47*, 7722–7724. <https://doi.org/10.1039/c1cc11996f>.
- (59) Perles, J.; Iglesias, M.; Martín-Luengo, M. Á.; Monge, M. A.; Ruiz-Valero, C.; Snejko, N. Metal-Organic Scandium Framework: Useful Material for Hydrogen Storage and Catalysis. *Chem. Mater.* **2005**, *17*, 5837–5842. <https://doi.org/10.1021/cm051362e>.

- (60) Lee, E. Y.; Jang, S. Y.; Suh, M. P. Multifunctionality and Crystal Dynamics of a Highly Stable, Porous Metal-Organic Framework [Zn<sub>4</sub>O(NTB)<sub>2</sub>]. *J. Am. Chem. Soc.* **2005**, *127*, 6374–6381. <https://doi.org/10.1021/ja043756x>.
- (61) Lee, Y.-G.; Moon, H. R.; Cheon, Y. E.; Suh, M. P. A Comparison of the H<sub>2</sub> Sorption Capacities of Isostructural Metal-Organic Frameworks With and Without Accessible Metal Sites: [Zn<sub>2</sub>(Abtc)(Dmf)<sub>2</sub>]<sub>3</sub> and [Cu<sub>2</sub>(Abtc)(Dmf)<sub>2</sub>]<sub>3</sub> versus [Cu<sub>2</sub>(Abtc)]<sub>3</sub>. *Angew. Chemie* **2008**, *120*, 7855–7859. <https://doi.org/10.1002/ange.200801488>.
- (62) Park, H. J.; Cheon, Y. E.; Suh, M. P. Post-Synthetic Reversible Incorporation of Organic Linkers into Porous Metal-Organic Frameworks through Single-Crystal-to-Single-Crystal Transformations and Modification of Gas-Sorption Properties. *Chem. - A Eur. J.* **2010**, *16*, 11662–11669. <https://doi.org/10.1002/chem.201001549>.
- (63) Kim, T. K.; Suh, M. P. Selective CO<sub>2</sub> Adsorption in a Flexible Non-Interpenetrated Metal-Organic Framework. *Chem. Commun.* **2011**, *47*, 4258–4260. <https://doi.org/10.1039/c0cc05199c>.
- (64) Prasad, T. K.; Hong, D. H.; Suh, M. P. High Gas Sorption and Metal-Ion Exchange of Microporous Metal-Organic Frameworks with Incorporated Imide Groups. *Chem. - A Eur. J.* **2010**, *16*, 14043–14050. <https://doi.org/10.1002/chem.201002135>.
- (65) Ahmed, A.; Seth, S.; Purewal, J.; Wong-Foy, A. G.; Veenstra, M.; Matzger, A. J.; Siegel, D. J. Exceptional Hydrogen Storage Achieved by Screening Nearly Half a Million Metal-Organic Frameworks. *Nat. Commun.* **2019**, *10*. <https://doi.org/10.1038/s41467-019-09365-w>.
- (66) Park, H. J.; Lim, D. W.; Yang, W. S.; Oh, T. R.; Suh, M. P. A Highly Porous Metal-Organic Framework: Structural Transformations of a Guest-Free MOF Depending on Activation Method and Temperature. *Chem. - A Eur. J.* **2011**, *17*, 7251–7260. <https://doi.org/10.1002/chem.201003376>.
- (67) Kramer, M.; Schwarz, U.; Kaskel, S. Synthesis and Properties of the Metal-Organic Framework Mo<sub>3</sub>(BTC)<sub>2</sub> (TUDMOF-1). *J. Mater. Chem.* **2006**, *16*, 2245–2248. <https://doi.org/10.1039/b601811d>.
- (68) Koh, K.; Wong-Foy, A. G.; Matzger, A. J. A Porous Coordination Copolymer with over 5000 m<sup>2</sup>/g BET Surface Area. *J. Am. Chem. Soc.* **2009**, *131*, 4184–4185. <https://doi.org/10.1021/ja809985t>.
- (69) Guo, Z.; Wu, H.; Srinivas, G.; Zhou, Y.; Xiang, S.; Chen, Z.; Yang, Y.; Zhou, W.; O’Keeffe, M.; Chen, B. A Metal-Organic Framework with Optimized Open Metal Sites and Pore Spaces for High Methane Storage at Room Temperature. *Angew. Chemie - Int. Ed.* **2011**, *50*, 3178–3181. <https://doi.org/10.1002/anie.201007583>.
- (70) Wong-Foy, A. G.; Lebel, O.; Matzger, A. J. Porous Crystal Derived from a Tricarboxylate Linker with Two Distinct Binding Motifs. *J. Am. Chem. Soc.* **2007**, *129*, 15740–15741. <https://doi.org/10.1021/ja0753952>.
- (71) Lou, J.; Xu, H.; Liu, Y.; Zhao, Y.; Daemen, L. L.; Brown, C.; Timofeeva, T. V.; Ma, S.; Zhou, H. C. Hydrogen Adsorption in a Highly Stable Porous Rare-Earth Metal-Organic Framework: Sorption Properties and Neutron Diffraction Studies. *J. Am. Chem. Soc.* **2008**, *130*, 9626–9627.

<https://doi.org/10.1021/ja801411f>.

- (72) Zhou, W.; Wu, H.; Hartman, M. R.; Yildirim, T. Hydrogen and Methane Adsorption in Metal-Organic Frameworks: A High-Pressure Volumetric Study. *J. Phys. Chem. C* **2007**, *111*, 16131–16137. <https://doi.org/10.1021/jp074889i>.
- (73) Panchariya, D. K.; Rai, R. K.; Anil Kumar, E.; Singh, S. K. Core-Shell Zeolitic Imidazolate Frameworks for Enhanced Hydrogen Storage. *ACS Omega* **2018**, *3*, 167–175. <https://doi.org/10.1021/acsomega.7b01693>.
- (74) Chen, B.; Ma, S.; Zapata, F.; Lobkovsky, E. B.; Yang, J. Hydrogen Adsorption in an Interpenetrated Dynamic Metal-Organic Framework. *Inorg. Chem.* **2006**, *45*, 5718–5720. <https://doi.org/10.1021/ic060437t>.
- (75) Liu, X.; Oh, M.; Lah, M. S. Size- and Shape-Selective Isostructural Microporous Metal-Organic Frameworks with Different Effective Aperture Sizes. *Inorg. Chem.* **2011**, *50*, 5044–5053. <https://doi.org/10.1021/ic200328q>.
- (76) Chun, H.; Dybtsev, D. N.; Kim, H.; Kim, K. Synthesis, X-Ray Crystal Structures, and Gas Sorption Properties of Pillared Square Grid Nets Based on Paddle-Wheel Motifs: Implications for Hydrogen Storage in Porous Materials. *Chem. - A Eur. J.* **2005**, *11*, 3521–3529. <https://doi.org/10.1002/chem.200401201>.
- (77) Takei, T.; Kawashima, J.; Ii, T.; Maeda, A.; Hasegawa, M.; Kitagawa, T.; Ohmura, T.; Ichikawa, M.; Hosoe, M.; Kanoya, I.; Mori, W. Hydrogen Adsorption Properties of Lantern-Type Dinuclear M(BDC)(DABCO) 1/2. *Bull. Chem. Soc. Jpn.* **2008**, *81*, 847–856. <https://doi.org/10.1246/bcsj.81.847>.
- (78) Farha, O. K.; Mulfort, K. L.; Hupp, J. T. An Example of Node-Based Postassembly Elaboration of a Hydrogen-Sorbing, Metal-Organic Framework Material. *Inorg. Chem.* **2008**, *47*, 10223–10225.
- (79) Lee, J.; Li, J.; Jagiello, J. Gas Sorption Properties of Microporous Metal Organic Frameworks. *J. Solid State Chem.* **2005**, *178*, 2527–2532. <https://doi.org/10.1016/j.jssc.2005.07.002>.
- (80) Panda, T.; Pachfule, P.; Chen, Y.; Jiang, J.; Banerjee, R. Amino Functionalized Zeolitic Tetrazolate Framework (ZTF) with High Capacity for Storage of Carbon Dioxide. *Chem. Commun.* **2011**, *47*, 2011–2013. <https://doi.org/10.1039/c0cc04169f>.
- (81) Debatin, F.; Thomas, A.; Kelling, A.; Hedin, N.; Bacsik, Z.; Senkovska, I.; Kaskel, S.; Junginger, M.; Müller, H.; Schilde, U.; Jäger, C.; Friedrich, A.; Holdt, H.-J. In Situ Synthesis of an Imidazolate-4-Amide-5-Imidate Ligand and Formation of a Microporous Zinc-Organic Framework with H<sub>2</sub>- and CO<sub>2</sub>-Storage Ability. *Angew. Chemie* **2010**, *122*, 1280–1284. <https://doi.org/10.1002/ange.200906188>.
- (82) Alezi, D.; Belmabkhout, Y.; Suyetin, M.; Bhatt, P. M.; Weseliński, L. J.; Solovyeva, V.; Adil, K.; Spanopoulos, I.; Trikalitis, P. N.; Emwas, A. H.; Eddaoudi, M. MOF Crystal Chemistry Paving the Way to Gas Storage Needs: Aluminum-Based Soc-MOF for CH<sub>4</sub>, O<sub>2</sub>, and CO<sub>2</sub> Storage. *J. Am. Chem. Soc.* **2015**, *137*, 13308–13318. <https://doi.org/10.1021/jacs.5b07053>.



- (83) Sharma, M. K.; Senkovska, I.; Kaskel, S.; Bharadwaj, P. K. Three-Dimensional Porous Cd(II) Coordination Polymer with Large One-Dimensional Hexagonal Channels: High Pressure CH<sub>4</sub> and H<sub>2</sub> Adsorption Studies. *Inorg. Chem.* **2011**, *50*, 539–544. <https://doi.org/10.1021/ic101412p>.
- (84) Kondo, M.; Yoshitomi, T.; Matsuzaka, H.; Kitagawa, S.; Seki, K. Three-Dimensional Framework with Channeling Cavities for Small Molecules:  $[M_2(4,4'\text{-Bpy})_3(\text{NO}_3)_4] \cdot x\text{H}_2\text{O}$  ( $M = \text{Co, Ni, Zn}$ ). *Angew. Chemie Int. Ed. English* **1997**, *36*, 1725–1727.
- (85) Kondo, M.; Shimamura, M.; Noro, S. I.; Minakoshi, S.; Asami, A.; Seki, K.; Kitagawa, S. Microporous Materials Constructed from the Interpenetrated Coordination Networks. Structures and Methane Adsorption Properties. *Chem. Mater.* **2000**, *12*, 1288–1299. <https://doi.org/10.1021/cm990612m>.
- (86) Wang, H.; Getzschmann, J.; Senkovska, I.; Kaskel, S. Structural Transformation and High Pressure Methane Adsorption of Co<sub>2</sub>(1,4-Bdc)<sub>2</sub>dabco. *Microporous Mesoporous Mater.* **2008**, *116*, 653–657. <https://doi.org/10.1016/j.micromeso.2008.05.037>.
- (87) Mason, J. A.; Veenstra, M.; Long, J. R. Evaluating Metal-Organic Frameworks for Natural Gas Storage. *Chem. Sci.* **2014**, *5*, 32–51. <https://doi.org/10.1039/c3sc52633j>.
- (88) Seki, K.; Mori, W. Syntheses and Characterization of Microporous Coordination Polymers with Open Frameworks. *J. Phys. Chem. B* **2002**, *106*, 1380–1385. <https://doi.org/10.1021/jp0130416>.
- (89) Seki, K. Design of an Adsorbent with an Ideal Pore Structure for Methane Adsorption Using Metal Complexes. *Chem. Commun.* **2001**, *1*, 1496–1497. <https://doi.org/10.1039/b104204c>.
- (90) Senkovska, I.; Kaskel, S. High Pressure Methane Adsorption in the Metal-Organic Frameworks Cu<sub>3</sub>(Btc)<sub>2</sub>, Zn<sub>2</sub>(Bdc)<sub>2</sub>dabco, and Cr<sub>3</sub>F(H<sub>2</sub>O)<sub>2</sub>O(Bdc)<sub>3</sub>. *Microporous Mesoporous Mater.* **2008**, *112*, 108–115. <https://doi.org/10.1016/j.micromeso.2007.09.016>.
- (91) Li, B.; Zhang, Z.; Li, Y.; Yao, K.; Zhu, Y.; Deng, Z.; Yang, F.; Zhou, X.; Li, G.; Wu, H.; Nijem, N.; Chabal, Y. J.; Lai, Z.; Han, Y.; Shi, Z.; Feng, S.; Li, J. Enhanced Binding Affinity, Remarkable Selectivity, and High Capacity of CO<sub>2</sub> by Dual Functionalization of a Rht-Type Metal-Organic Framework. *Angew. Chemie - Int. Ed.* **2012**, *51*, 1412–1415. <https://doi.org/10.1002/anie.201105966>.
- (92) Senkovska, I.; Hoffmann, F.; Fröba, M.; Getzschmann, J.; Böhlmann, W.; Kaskel, S. New Highly Porous Aluminium Based Metal-Organic Frameworks: Al(OH)(Ndc) (Ndc = 2,6-Naphthalene Dicarboxylate) and Al(OH)(Bpdc) (Bpdc = 4,4'-Biphenyl Dicarboxylate). *Microporous Mesoporous Mater.* **2009**, *122*, 93–98. <https://doi.org/10.1016/j.micromeso.2009.02.020>.
- (93) Klein, N.; Hoffmann, H. C.; Cadiou, A.; Getzschmann, J.; Lohe, M. R.; Paasch, S.; Heydenreich, T.; Adil, K.; Senkovska, I.; Brunner, E.; Kaskel, S. Structural Flexibility and Intrinsic Dynamics in the M<sub>2</sub>(2,6-Ndc)<sub>2</sub>(Dabco) (M = Ni, Cu, Co, Zn) Metal-Organic Frameworks. *J. Mater. Chem.* **2012**, *22*, 10303–10312. <https://doi.org/10.1039/c2jm15601f>.
- (94) Gedrich, K.; Senkovska, I.; Klein, N.; Stoeck, U.; Henschel, A.; Lohe, M. R.; Baburin, I. A.; Mueller, U.; Kaskel, S. A Highly Porous Metal-Organic Framework with Open Nickel Sites. *Angew. Chemie - Int. Ed.* **2010**, *49*, 8489–8492. <https://doi.org/10.1002/anie.201001735>.

- (95) Gr nker, R.; Senkovska, I.; Biedermann, R.; Klein, N.; Lohe, M. R.; M ller, P.; Kaskel, S. A Highly Porous Flexible Metal–Organic Framework with Corundum Topology. *Chem. Commun.* **2011**, *47*, 490–492.
- (96) Klein, N.; Senkovska, I.; Baburin, I. A.; Gr nker, R.; Stoeck, U.; Schlichtenmayer, M.; Streppel, B.; Mueller, U.; Leoni, S.; Hirscher, M.; Kaskel, S. Route to a Family of Robust, Non-Interpenetrated Metal-Organic Frameworks with Pto-like Topology. *Chem. - A Eur. J.* **2011**, *17*, 13007–13016. <https://doi.org/10.1002/chem.201101383>.
- (97) Stoeck, U.; Krause, S.; Bon, V.; Senkovska, I.; Kaskel, S. A Highly Porous Metal–Organic Framework, Constructed from a Cuboctahedral Super-Molecular Building Block, with Exceptionally High Methane Uptake. *Chem. Commun.* **2012**, *48*, 10841–10843. <https://doi.org/10.1039/c2cc34840c>.
- (98) Peng, Y.; Krungleviciute, V.; Eryazici, I.; Hupp, J. T.; Farha, O. K.; Yildirim, T. Methane Storage in Metal–Organic Frameworks: Current Records, Surprise Findings, and Challenges. *J. Am. Chem. Soc.* **2013**, *135*, 11887–11894.
- (99) Eddaoudi, M.; Kim, J.; Rosi, N.; Vodak, D.; Wachter, J.; O’Keeffe, M.; Yaghi, O. M. Systematic Design of Pore Size and Functionality in Isorecticular MOFs and Their Application in Methane Storage. *Science (80-. )*. **2002**, *295*, 469–472. <https://doi.org/10.1126/science.1067208>.
- (100) Feldblyum, J. I.; Dutta, D.; Wong-Foy, A. G.; Dailly, A.; Imirzian, J.; Gidley, D. W.; Matzger, A. J. Interpenetration, Porosity, and High-Pressure Gas Adsorption in Zn 4O(2,6-Naphthalene Dicarboxylate)3. *Langmuir* **2013**, *29*, 8146–8153. <https://doi.org/10.1021/la401323t>.
- (101) Bolinois, L.; Kundu, T.; Wang, X.; Wang, Y.; Hu, Z.; Koh, K.; Zhao, D. Breathing-Induced New Phase Transition in an MIL-53(Al)-NH<sub>2</sub> Metal-Organic Framework under High Methane Pressures. *Chem. Commun.* **2017**, *53*, 8118–8121. <https://doi.org/10.1039/c7cc02743e>.
- (102) Bourrelly, S.; Llewellyn, P. L.; Serre, C.; Millange, F.; Loiseau, T.; F rey, G. Different Adsorption Behaviors of Methane and Carbon Dioxide in the Isotypic Nanoporous Metal Terephthalates MIL-53 and MIL-47. *J. Am. Chem. Soc.* **2005**, *127*, 13519–13521. <https://doi.org/10.1021/ja054668v>.
- (103) Llewellyn, P. L.; Bourrelly, S.; Serre, C.; Vimont, A.; Daturi, M.; Hamon, L.; De Weireld, G.; Chang, J.-S.; Hong, D.-Y.; Kyu Hwang, Y.; others. High Uptakes of CO<sub>2</sub> and CH<sub>4</sub> in Mesoporous Metal-Organic Frameworks MIL-100 and MIL-101. *Langmuir* **2008**, *24*, 7245–7250.
- (104) Wiersum, A. D.; Chang, J. S.; Serre, C.; Llewellyn, P. L. An Adsorbent Performance Indicator as a First Step Evaluation of Novel Sorbents for Gas Separations: Application to Metal-Organic Frameworks. *Langmuir* **2013**, *29*, 3301–3309. <https://doi.org/10.1021/la3044329>.
- (105) Wu, H.; Zhou, W.; Yildirim, T. High-Capacity Methane Storage in Metal-Organic Frameworks M2(Dhtp): The Important Role of Open Metal Sites. *J. Am. Chem. Soc.* **2009**, *131*, 4995–5000. <https://doi.org/10.1021/ja900258t>.
- (106) He, Y.; Zhou, W.; Yildirim, T.; Chen, B. A Series of Metal–Organic Frameworks with High Methane Uptake and an Empirical Equation for Predicting Methane Storage Capacity. *Energy & Environ. Sci.* **2013**, *6*, 2735–2744.
- (107) Lu, Z.; Du, L.; Tang, K.; Bai, J. High H<sub>2</sub> and CH<sub>4</sub> Adsorption Capacity of a Highly Porous (2, 3, 4)-Connected Metal–Organic Framework. *Cryst. growth*

\& Des. **2013**, *13*, 2252–2255.

- (108) He, Y.; Zhou, W.; Qian, G.; Chen, B. Methane Storage in Metal-Organic Frameworks. *Chem. Soc. Rev.* **2014**, *43*, 5657–5678. <https://doi.org/10.1039/c4cs00032c>.
- (109) Peng, Y.; Srinivas, G.; Wilmer, C. E.; Eryazici, I.; Snurr, R. Q.; Farha, O. K.; Yildirim, T. Simultaneously High Gravimetric and Volumetric Methane Uptake Characteristics of the Metal-Organic Framework NU-111. *Chem. Commun.* **2013**, *49*, 2992–2994. <https://doi.org/10.1039/c3cc40819a>.
- (110) Wilmer, C. E.; Farha, O. K.; Yildirim, T.; Eryazici, I.; Krungleviciute, V.; Sarjeant, A. A.; Snurr, R. Q.; Hupp, J. T. Gram-Scale, High-Yield Synthesis of a Robust Metal-Organic Framework for Storing Methane and Other Gases. *Energy Environ. Sci.* **2013**, *6*, 1158–1163. <https://doi.org/10.1039/c3ee24506c>.
- (111) Barin, G.; Krungleviciute, V.; Gomez-Gualdron, D. A.; Sarjeant, A. A.; Snurr, R. Q.; Hupp, J. T.; Yildirim, T.; Farha, O. K. Isoreticular Series of (3,24)-Connected Metal-Organic Frameworks: Facile Synthesis and High Methane Uptake Properties. *Chem. Mater.* **2014**, *26*, 1912–1917. <https://doi.org/10.1021/cm404155s>.
- (112) Gomez-Gualdron, D. A.; Gutov, O. V.; Krungleviciute, V.; Borah, B.; Mondloch, J. E.; Hupp, J. T.; Yildirim, T.; Farha, O. K.; Snurr, R. Q. Computational Design of Metal-Organic Frameworks Based on Stable Zirconium Building Units for Storage and Delivery of Methane. *Chem. Mater.* **2014**, *26*, 5632–5639. <https://doi.org/10.1021/cm502304e>.
- (113) Lu, W.; Yuan, D.; Makal, T. A.; Li, J.-R.; Zhou, H.-C. A Highly Porous and Robust (3,3,4)-Connected Metal-Organic Framework Assembled with a 90° Bridging-Angle Embedded Octacarboxylate Ligand. *Angew. Chemie* **2012**, *124*, 1612–1616. <https://doi.org/10.1002/ange.201106615>.
- (114) Prasad, T. K.; Suh, M. P. Control of Interpenetration and Gas-Sorption Properties of Metal-Organic Frameworks by a Simple Change in Ligand Design. *Chem. - A Eur. J.* **2012**, *18*, 8673–8680. <https://doi.org/10.1002/chem.201200456>.
- (115) Das, M. C.; Xu, H.; Wang, Z.; Srinivas, G.; Zhou, W.; Yue, Y. F.; Nesterov, V. N.; Qian, G.; Chen, B. A Zn<sub>4</sub>O-Containing Doubly Interpenetrated Porous Metal-Organic Framework for Photocatalytic Decomposition of Methyl Orange. *Chem. Commun.* **2011**, *47*, 11715–11717. <https://doi.org/10.1039/c1cc12802g>.
- (116) He, Y.; Xiang, S.; Zhang, Z.; Xiong, S.; Wu, C.; Zhou, W.; Yildirim, T.; Krishna, R.; Chen, B. A Microporous Metal-Organic Framework Assembled from an Aromatic Tetracarboxylate for H<sub>2</sub> Purification. *J. Mater. Chem. A* **2013**, *1*, 2543–2551. <https://doi.org/10.1039/c2ta01260j>.
- (117) Li, B.; Wen, H. M.; Wang, H.; Wu, H.; Yildirim, T.; Zhou, W.; Chen, B. Porous Metal-Organic Frameworks with Lewis Basic Nitrogen Sites for High-Capacity Methane Storage. *Energy Environ. Sci.* **2015**, *8*, 2504–2511. <https://doi.org/10.1039/c5ee01531f>.
- (118) Wen, H. M.; Li, B.; Yuan, D.; Wang, H.; Yildirim, T.; Zhou, W.; Chen, B. A Porous Metal-Organic Framework with an Elongated Anthracene Derivative Exhibiting a High Working Capacity for the Storage of Methane. *J. Mater. Chem. A* **2014**, *2*, 11516–11522. <https://doi.org/10.1039/c4ta01860e>.

- (119) Chang, G.; Li, B.; Wang, H.; Bao, Z.; Yildirim, T.; Yao, Z.; Xiang, S.; Zhou, W.; Chen, B. A Microporous Metal-Organic Framework with Polarized Trifluoromethyl Groups for High Methane Storage. *Chem. Commun.* **2015**, *51*, 14789–14792. <https://doi.org/10.1039/c5cc05850c>.
- (120) Duan, X.; Wu, C.; Xiang, S.; Zhou, W.; Yildirim, T.; Cui, Y.; Yang, Y.; Chen, B.; Qian, G. Novel Microporous Metal-Organic Framework Exhibiting High Acetylene and Methane Storage Capacities. *Inorg. Chem.* **2015**, *54*, 4377–4381. <https://doi.org/10.1021/acs.inorgchem.5b00194>.
- (121) Song, C.; Ling, Y.; Feng, Y.; Zhou, W.; Yildirim, T.; He, Y. A NbO-Type Metal-Organic Framework Exhibiting High Deliverable Capacity for Methane Storage. *Chem. Commun.* **2015**, *51*, 8508–8511.
- (122) Park, M.; Moon, D.; Yoon, J. W.; Chang, J. S.; Lah, M. S. A Metal-Organic Framework Based on an Unprecedented Nonanuclear Cluster as a Secondary Building Unit: Structure and Gas Sorption Behavior. *Chem. Commun.* **2009**, 2026–2028. <https://doi.org/10.1039/b818648k>.
- (123) An, J.; Rosi, N. L. Tuning MOF CO<sub>2</sub> Adsorption Properties via Cation Exchange. *J. Am. Chem. Soc.* **2010**, *132*, 5578–5579. <https://doi.org/10.1021/ja1012992>.
- (124) Si, X.; Jiao, C.; Li, F.; Zhang, J.; Wang, S.; Liu, S.; Li, Z.; Sun, L.; Xu, F.; Gabelica, Z.; Schick, C. High and Selective CO<sub>2</sub> Uptake, H<sub>2</sub> Storage and Methanol Sensing on the Amine-Decorated 12-Connected MOF CAU-1. *Energy Environ. Sci.* **2011**, *4*, 4522–4527. <https://doi.org/10.1039/c1ee01380g>.
- (125) Wu, C. De; Lin, W. Highly Porous, Homochiral Metal-Organic Frameworks: Solvent-Exchange- Induced Single-Crystal to Single-Crystal Transformations. *Angew. Chemie - Int. Ed.* **2005**, *44*, 1958–1961. <https://doi.org/10.1002/anie.200462711>.
- (126) Hou, L.; Shi, W. J.; Wang, Y. Y.; Guo, Y.; Jin, C.; Shi, Q. Z. A Rod Packing Microporous Metal-Organic Framework: Unprecedented Ukv Topology, High Sorption Selectivity and Affinity for CO<sub>2</sub>. *Chem. Commun.* **2011**, *47*, 5464–5466. <https://doi.org/10.1039/c1cc10990a>.
- (127) Tian, J.; Motkuri, R. K.; Thallapally, P. K.; McGrail, B. P. Metal-Organic Framework Isomers with Diamondoid Networks Constructed of a Semirigid Tetrahedral Linker. *Cryst. Growth Des.* **2010**, *10*, 5327–5333. <https://doi.org/10.1021/cg101222w>.
- (128) Pachfule, P.; Panda, T.; Dey, C.; Banerjee, R. Structural Diversity in a Series of Metal-Organic Frameworks (MOFs) Composed of Divalent Transition Metals, 4, 4'-Bipyridine and a Flexible Carboxylic Acid. *CrystEngComm* **2010**, *12*, 2381–2389.
- (129) Tian, Y. Q.; Yao, S. Y.; Gu, D.; Cui, K. H.; Guo, D. W.; Zhang, G.; Chen, Z. X.; Zhao, D. Y. Cadmium Imidazolate Frameworks with Polymorphism, High Thermal Stability, and a Large Surface Area. *Chem. - A Eur. J.* **2010**, *16* (4), 1137–1141. <https://doi.org/10.1002/chem.200902729>.
- (130) Herm, Z. R.; Swisher, J. A.; Smit, B.; Krishna, R.; Long, J. R. Metal-Organic Frameworks as Adsorbents for Hydrogen Purification and Precombustion Carbon Dioxide Capture. *J. Am. Chem. Soc.* **2011**, *133*, 5664–5667. <https://doi.org/10.1021/ja111411q>.
- (131) Chen, S. S.; Chen, M.; Takamizawa, S.; Wang, P.; Lv, G. C.; Sun, W. Y. Porous Cobalt(II)-Imidazolate Supramolecular Isomeric Frameworks with Selective Gas Sorption Property. *Chem. Commun.* **2011**, *47*, 4902–4904. <https://doi.org/10.1039/c1cc10899a>.

- (132) Caskey, S. R.; Wong-Foy, A. G.; Matzger, A. J. Dramatic Tuning of Carbon Dioxide Uptake via Metal Substitution in a Coordination Polymer with Cylindrical Pores. *J. Am. Chem. Soc.* **2008**, *130*, 10870–10871. <https://doi.org/10.1021/ja8036096>.
- (133) Lin, Q.; Wu, T.; Zheng, S. T.; Bu, X.; Feng, P. Single-Walled Polytetrazolate Metal-Organic Channels with High Density of Open Nitrogen-Donor Sites and Gas Uptake. *J. Am. Chem. Soc.* **2012**, *134*, 784–787. <https://doi.org/10.1021/ja2092882>.
- (134) García-Ricard, O. J.; Hernández-Maldonado, A. J. Temperature , Textural Properties , and CO<sub>2</sub> Adsorption at Low Pressure Range. *J. Phys. Chem. C* **2010**, *114*, 1827–1834.
- (135) Zhao, X.; Bu, X.; Zhai, Q. G.; Tran, H.; Feng, P. Pore Space Partition by Symmetry-Matching Regulated Ligand Insertion and Dramatic Tuning on Carbon Dioxide Uptake. *J. Am. Chem. Soc.* **2015**, *137*, 1396–1399. <https://doi.org/10.1021/ja512137t>.
- (136) Zheng, S. T.; Bu, J. T.; Li, Y.; Wu, T.; Zuo, F.; Feng, P.; Bu, X. Pore Space Partition and Charge Separation in Cage-within-Cage Indium-Organic Frameworks with High CO<sub>2</sub> Uptake. *J. Am. Chem. Soc.* **2010**, *132*, 17062–17064. <https://doi.org/10.1021/ja106903p>.
- (137) Navarro, J. A. R.; Barea, E.; Salas, J. M.; Masciocchi, N.; Galli, S.; Sironi, A.; Ania, C. O.; Parra, J. B. H<sub>2</sub>, N<sub>2</sub>, CO, and CO<sub>2</sub> Sorption Properties of a Series of Robust Sodalite-Type Microporous Coordination Polymers. *Inorg. Chem.* **2006**, *45*, 2397–2399. <https://doi.org/10.1021/ic060049r>.
- (138) Xiang, S.; He, Y.; Zhang, Z.; Wu, H.; Zhou, W.; Krishna, R.; Chen, B. Microporous Metal-Organic Framework with Potential for Carbon Dioxide Capture at Ambient Conditions. *Nat. Commun.* **2012**, *3*, 1–9.
- (139) Kitaura, R.; Matsuda, R.; Kubota, Y.; Kitagawa, S.; Takata, M.; Kobayashi, T. C.; Suzuki, M. Formation and Characterization of Crystalline Molecular Arrays of Gas Molecules in a 1-Dimensional Ultramicropore of a Porous Copper Coordination Polymer. *J. Phys. Chem. B* **2005**, *109*, 23378–23385. <https://doi.org/10.1021/jp054411j>.
- (140) Zheng, B.; Yang, Z.; Bai, J.; Li, Y.; Li, S. High and Selective CO<sub>2</sub> Capture by Two Mesoporous Acylamide-Functionalized Rht-Type Metal-Organic Frameworks. *Chem. Commun.* **2012**, *48*, 7025–7027. <https://doi.org/10.1039/c2cc17593b>.
- (141) Lincke, J.; Lässig, D.; Möllmer, J.; Reichenbach, C.; Puls, A.; Möller, A.; Gläser, R.; Kalies, G.; Staudt, R.; Krautscheid, H. A Novel Copper-Based MOF Material: Synthesis, Characterization and Adsorption Studies. *Microporous mesoporous Mater.* **2011**, *142*, 62–69.
- (142) Demessence, A.; D'Alessandro, D. M.; Foo, M. L.; Long, J. R. Strong CO<sub>2</sub> Binding in a Water-Stable, Triazolate-Bridged Metal-Organic Framework Functionalized with Ethylenediamine. *J. Am. Chem. Soc.* **2009**, *131*, 8784–8786. <https://doi.org/10.1021/ja903411w>.
- (143) Zheng, B.; Bai, J.; Duan, J.; Wojtas, L.; Zaworotko, M. J. Enhanced CO<sub>2</sub> Binding Affinity of a High-Uptake Rht-Type Metal-Organic Framework Decorated with Acylamide Groups. *J. Am. Chem. Soc.* **2011**, *133*, 748–751.
- (144) Sumida, K.; Horike, S.; Kaye, S. S.; Herm, Z. R.; Queen, W. L.; Brown, C. M.; Grandjean, F.; Long, G. J.; Dailly, A.; Long, J. R. Hydrogen Storage and

Carbon Dioxide Capture in an Iron-Based Sodalite-Type Metal-Organic Framework (Fe-BTT) Discovered via High-Throughput Methods. *Chem. Sci.* **2010**, *1*, 184–191. <https://doi.org/10.1039/c0sc00179a>.

- (145) Mason, J. A.; McDonald, T. M.; Bae, T. H.; Bachman, J. E.; Sumida, K.; Dutton, J. J.; Kaye, S. S.; Long, J. R. Application of a High-Throughput Analyzer in Evaluating Solid Adsorbents for Post-Combustion Carbon Capture via Multicomponent Adsorption of CO<sub>2</sub>, N<sub>2</sub>, and H<sub>2</sub>O. *J. Am. Chem. Soc.* **2015**, *137*, 4787–4803. <https://doi.org/10.1021/jacs.5b00838>.
- (146) Sumida, K.; Rogow, D. L.; Mason, J. A.; McDonald, T. M.; Bloch, E. D.; Herm, Z. R.; Bae, T.-H.; Long, J. R. Carbon Dioxide Capture in Metal-Organic Frameworks. *Chem. Rev.* **2012**, *112*, 724–781.
- (147) Liang, L.; Liu, C.; Jiang, F.; Chen, Q.; Zhang, L.; Xue, H.; Jiang, H.-L.; Qian, J.; Yuan, D.; Hong, M. Carbon Dioxide Capture and Conversion by an Acid-Base Resistant Metal-Organic Framework. *Nat. Commun.* **2017**, *8*, 1–10.
- (148) Fernandez, C. A.; Thallapally, P. K.; Motkuri, R. K.; Nune, S. K.; Sumrak, J. C.; Tian, J.; Liu, J. Gas-Induced Expansion and Contraction of a Fluorinated Metal-Organic Framework. *Cryst. Growth Des.* **2010**, *10*, 1037–1039. <https://doi.org/10.1021/cg9014948>.
- (149) Millward, A. R.; Yaghi, O. M. Metal-Organic Frameworks with Exceptionally High Capacity for Storage of Carbon Dioxide at Room Temperature. *J. Am. Chem. Soc.* **2005**, *127*, 17998–17999. <https://doi.org/10.1021/ja0570032>.
- (150) Ling, Y.; Deng, M.; Chen, Z.; Xia, B.; Liu, X.; Yang, Y.; Zhou, Y.; Weng, L. Enhancing CO<sub>2</sub> Adsorption of a Zn-Phosphonocarboxylate Framework by Pore Space Partitions. *Chem. Commun.* **2013**, *49*, 78–80. <https://doi.org/10.1039/c2cc37174j>.
- (151) Qin, J. S.; Du, D. Y.; Li, W. L.; Zhang, J. P.; Li, S. L.; Su, Z. M.; Wang, X. L.; Xu, Q.; Shao, K. Z.; Lan, Y. Q. N-Rich Zeolite-like Metal-Organic Framework with Sodalite Topology: High CO<sub>2</sub> Uptake, Selective Gas Adsorption and Efficient Drug Delivery. *Chem. Sci.* **2012**, *3*, 2114–2118. <https://doi.org/10.1039/c2sc00017b>.
- (152) Tan, Y. X.; Wang, F.; Kang, Y.; Zhang, J. Dynamic Microporous Indium(III)-4,4'-Oxybis(Benzoate) Framework with High Selectivity for the Adsorption of CO<sub>2</sub> over N<sub>2</sub>. *Chem. Commun.* **2011**, *47*, 770–772. <https://doi.org/10.1039/c0cc04095a>.
- (153) Möllmer, J.; Celer, E. B.; Luebke, R.; Cairns, A. J.; Staudt, R.; Eddaoudi, M.; Thommes, M. Insights on Adsorption Characterization of Metal-Organic Frameworks: A Benchmark Study on the Novel Soc-MOF. *Microporous Mesoporous Mater.* **2010**, *129*, 345–353.
- (154) Chen, S.; Zhang, J.; Wu, T.; Feng, P.; Bu, X. Multiroute Synthesis of Porous Anionic Frameworks and Size-Tunable Extraframework Organic Cation-Controlled Gas Sorption Properties. *J. Am. Chem. Soc.* **2009**, *131*, 16027–16029. <https://doi.org/10.1021/ja906302t>.
- (155) Orefuwa, S.; Iriowen, E.; Yang, H.; Wakefield, B.; Goudy, A. Effects of Nitro-Functionalization on the Gas Adsorption Properties of Isostructural Metal-Organic Framework-Eight (IRMOF-8). *Microporous Mesoporous Mater.* **2013**, *177*, 82–90. <https://doi.org/10.1016/j.micromeso.2013.04.023>.

- (156) Bae, Y. S.; Dubbeldam, D.; Nelson, A.; Walton, K. S.; Hupp, J. T.; Snurr, R. Q. Strategies for Characterization of Large-Pore Metal-Organic Frameworks by Combined Experimental and Computational Methods. *Chem. Mater.* **2009**, *21*, 4768–4777. <https://doi.org/10.1021/cm803218f>.
- (157) Fracaroli, A. M.; Furukawa, H.; Suzuki, M.; Dodd, M.; Okajima, S.; Gándara, F.; Reimer, J. A.; Yaghi, O. M. Metal-Organic Frameworks with Precisely Designed Interior for Carbon Dioxide Capture in the Presence of Water. *J. Am. Chem. Soc.* **2014**, *136*, 8863–8866.
- (158) Chen, C. X.; Zheng, S. P.; Wei, Z. W.; Cao, C. C.; Wang, H. P.; Wang, D.; Jiang, J. J.; Fenske, D.; Su, C. Y. A Robust Metal–Organic Framework Combining Open Metal Sites and Polar Groups for Methane Purification and CO<sub>2</sub>/Fluorocarbon Capture. *Chem. - A Eur. J.* **2017**, *23*, 4060–4064. <https://doi.org/10.1002/chem.201606038>.
- (159) Chen, C.-X.; Wei, Z.; Jiang, J.-J.; Fan, Y.-Z.; Zheng, S.-P.; Cao, C.-C.; Li, Y.-H.; Fenske, D.; Su, C.-Y. Precise Modulation of the Breathing Behavior and Pore Surface in Zr-MOFs by Reversible Post-Synthetic Variable-Spacer Installation to Fine-Tune the Expansion Magnitude and Sorption Properties. *Angew. Chemie* **2016**, *128*, 10086–10090.
- (160) Zhang, J. P.; Chen, X. M. Optimized Acetylene/Carbon Dioxide Sorption in a Dynamic Porous Crystal. *J. Am. Chem. Soc.* **2009**, *131*, 5516–5521. <https://doi.org/10.1021/ja8089872>.
- (161) Liao, P. Q.; Zhou, D. D.; Zhu, A. X.; Jiang, L.; Lin, R. B.; Zhang, J. P.; Chen, X. M. Strong and Dynamic CO<sub>2</sub> Sorption in a Flexible Porous Framework Possessing Guest Chelating Claws. *J. Am. Chem. Soc.* **2012**, *134*, 17380–17383. <https://doi.org/10.1021/ja3073512>.
- (162) Lin, J.-B.; Zhang, J.-P.; Chen, X.-M. Nonclassical Active Site for Enhanced Gas Sorption in Porous Coordination Polymer. *J. Am. Chem. Soc.* **2010**, *132*, 6654–6656.
- (163) Lin, R. B.; Chen, D.; Lin, Y. Y.; Zhang, J. P.; Chen, X. M. A Zeolite-like Zinc Triazolate Framework with High Gas Adsorption and Separation Performance. *Inorg. Chem.* **2012**, *51*, 9950–9955. <https://doi.org/10.1021/ic301463z>.
- (164) Cheon, Y. E.; Park, J.; Suh, M. P. Selective Gas Adsorption in a Magnesium-Based Metal-Organic Framework. *Chem. Commun.* **2009**, 5436–5438. <https://doi.org/10.1039/b910228k>.
- (165) McDonald, T. M.; Lee, W. R.; Mason, J. A.; Wiers, B. M.; Hong, C. S.; Long, J. R. Capture of Carbon Dioxide from Air and Flue Gas in the Alkylamine-Appended Metal-Organic Framework Mmen-Mg<sub>2</sub>(Dobpdc). *J. Am. Chem. Soc.* **2012**, *134*, 7056–7065. <https://doi.org/10.1021/ja300034j>.
- (166) Mallick, A.; Saha, S.; Pachfule, P.; Roy, S.; Banerjee, R. Selective CO<sub>2</sub> and H<sub>2</sub> Adsorption in a Chiral Magnesium-Based Metal Organic Framework (Mg-MOF) with Open Metal Sites. *J. Mater. Chem.* **2010**, *20*, 9073–9080. <https://doi.org/10.1039/c0jm01125h>.
- (167) Bao, Z.; Yu, L.; Ren, Q.; Lu, X.; Deng, S. Adsorption of CO<sub>2</sub> and CH<sub>4</sub> on a Magnesium-Based Metal Organic Framework. *J. Colloid Interface Sci.* **2011**, *353*, 549–556. <https://doi.org/10.1016/j.jcis.2010.09.065>.

- (168) Dietzel, P. D. C.; Besikiotis, V.; Blom, R. Application of Metal-Organic Frameworks with Coordinatively Unsaturated Metal Sites in Storage and Separation of Methane and Carbon Dioxide. *J. Mater. Chem.* **2009**, *19*, 7362–7370. <https://doi.org/10.1039/b911242a>.
- (169) Rallapalli, P.; Prasanth, K. P.; Patil, D.; Somani, R. S.; Jasra, R. V.; Bajaj, H. C. Sorption Studies of CO<sub>2</sub>, CH<sub>4</sub>, N<sub>2</sub>, CO, O<sub>2</sub> and Ar on Nanoporous Aluminum Terephthalate [MIL-53(Al)]. *J. Porous Mater.* **2011**, *18*, 205–210. <https://doi.org/10.1007/s10934-010-9371-7>.
- (170) Loiseau, T.; Lecroq, L.; Volkringer, C.; Marrot, J.; Férey, G.; Haouas, M.; Taulelle, F.; Bourrelly, S.; Llewellyn, P. L.; Latroche, M. MIL-96, a Porous Aluminum Trimesate 3D Structure Constructed from a Hexagonal Network of 18-Membered Rings and M3-Oxo-Centered Trinuclear Units. *J. Am. Chem. Soc.* **2006**, *128*, 10223–10230. <https://doi.org/10.1021/ja0621086>.
- (171) Chowdhury, P.; Mekala, S.; Dreisbach, F.; Gumma, S. Adsorption of CO, CO<sub>2</sub> and CH<sub>4</sub> on Cu-BTC and MIL-101 Metal Organic Frameworks: Effect of Open Metal Sites and Adsorbate Polarity. *Microporous Mesoporous Mater.* **2012**, *152*, 246–252.
- (172) Surblé, S.; Millange, F.; Serre, C.; Düren, T.; Latroche, M.; Bourrelly, S.; Llewellyn, P. L.; Férey, G. Synthesis of MIL-102, a Chromium Carboxylate Metal-Organic Framework, with Gas Sorption Analysis. *J. Am. Chem. Soc.* **2006**, *128*, 14889–14896. <https://doi.org/10.1021/ja064343u>.
- (173) Volkringer, C.; Loiseau, T.; Haouas, M.; Taulelle, F.; Popov, D.; Burghammer, M.; Riekkel, C.; Zlotea, C.; Cuevas, F.; Latroche, M.; Phanon, D.; Knöfel, C.; Llewellyn, P. L.; Férey, G. Occurrence of Uncommon Infinite Chains Consisting of Edge-Sharing Octahedra in a Porous Metal Organic Framework-Type Aluminum Pyromellitate Al<sub>4</sub>(OH)<sub>8</sub>[C<sub>10</sub>O<sub>8</sub>H<sub>2</sub>](MIL-120): Synthesis, Structure, and Gas Sorption Properties. *Chem. Mater.* **2009**, *21*, 5783–5791. <https://doi.org/10.1021/cm9023106>.
- (174) McDonald, T. M.; D'Alessandro, D. M.; Krishna, R.; Long, J. R. Enhanced Carbon Dioxide Capture upon Incorporation of N,N'-Dimethylethylenediamine in the Metal-Organic Framework CuBTTri. *Chem. Sci.* **2011**, *2*, 2022–2028. <https://doi.org/10.1039/c1sc00354b>.
- (175) Foo, M. L.; Matsuda, R.; Hijikata, Y.; Krishna, R.; Sato, H.; Horike, S.; Hori, A.; Duan, J.; Sato, Y.; Kubota, Y.; Takata, M.; Kitagawa, S. An Adsorbate Discriminatory Gate Effect in a Flexible Porous Coordination Polymer for Selective Adsorption of CO<sub>2</sub> over C<sub>2</sub>H<sub>2</sub>. *J. Am. Chem. Soc.* **2016**, *138*, 3022–3030. <https://doi.org/10.1021/jacs.5b10491>.
- (176) Hoi, R. M.; Kobayashi, N.; Myunghyun, P. S. Porous Metal-Organic Framework with Coordinatively Unsaturated Mn II Sites: Sorption Properties for Various Gases. *Inorg. Chem.* **2006**, *45*, 8672–8676. <https://doi.org/10.1021/ic0611948>.
- (177) Bloch, E. D.; Britt, D.; Lee, C.; Doonan, C. J.; Uribe-Romo, F. J.; Furukawa, H.; Long, J. R.; Yaghi, O. M. Metal Insertion in a Microporous Metal-Organic Framework Lined with 2,2'-Bipyridine. *J. Am. Chem. Soc.* **2010**, *132*, 14382–14384. <https://doi.org/10.1021/ja106935d>.
- (178) Lee, C. H.; Huang, H. Y.; Lee, J. J.; Huang, C. Y.; Kao, Y. C.; Lee, G. H.; Peng, S. M.; Jiang, J. C.; Chao, I.; Lu, K. L. Amide-CO<sub>2</sub> Interaction Induced Gate-Opening Behavior for CO<sub>2</sub> Adsorption in 2-Fold Interpenetrating Framework. *ChemistrySelect* **2016**, *1*, 2923–2929. <https://doi.org/10.1002/slct.201600345>.



- (179) Saha, D.; Bao, Z.; Jia, F.; Deng, S. Adsorption of CO<sub>2</sub>, CH<sub>4</sub>, N<sub>2</sub>O, and N<sub>2</sub> on MOF-5, MOF-177, and Zeolite 5A. *Environ. Sci. & Technol.* **2010**, *44*, 1820–1826.
- (180) Barcia, P. S.; Bastin, L.; Hurtado, E. J.; Silva, J. A. C.; Rodrigues, A. E.; Chen, B. Single and Multicomponent Sorption of CO<sub>2</sub>, CH<sub>4</sub> and N<sub>2</sub> in a Microporous Metal-Organic Framework. *Sep. Sci. Technol.* **2008**, *43*, 3494–3521. <https://doi.org/10.1080/01496390802282347>.
- (181) Couck, S.; Denayer, J. F. M.; Baron, G. V.; Rémy, T.; Gascon, J.; Kapteijn, F. An Amine-Functionalized MIL-53 Metal-Organic Framework with Large Separation Power for CO<sub>2</sub> and CH<sub>4</sub>. *J. Am. Chem. Soc.* **2009**, *131*, 6326–6327. <https://doi.org/10.1021/ja900555r>.
- (182) Wu, C. De; Lin, W. Homochiral Porous Solids Based on 1D Coordination Polymers Built from 46-Membered Macrocycles. *Dalt. Trans.* **2006**, 4563–4569. <https://doi.org/10.1039/b606817k>.
- (183) Chen, Z.; Liu, X.; Zhang, C.; Zhang, Z.; Liang, F. Structure, Adsorption and Magnetic Properties of Chiral Metal-Organic Frameworks Bearing Linear Trinuclear Secondary Building Blocks. *Dalt. Trans.* **2011**, *40*, 1911–1918. <https://doi.org/10.1039/c0dt01278e>.
- (184) Nandi, S.; De Luna, P.; Daff, T. D.; Rother, J.; Liu, M.; Buchanan, W.; Hawari, A. I.; Woo, T. K.; Vaidhyanathan, R. A Single-Ligand Ultra-Microporous MOF for Precombustion CO<sub>2</sub> Capture and Hydrogen Purification. *Sci. Adv.* **2015**, *1*, 1–10. <https://doi.org/10.1126/sciadv.1500421>.
- (185) Duan, J.; Yang, Z.; Bai, J.; Zheng, B.; Li, Y.; Li, S. Highly Selective CO<sub>2</sub> Capture of an Agw-Type Metal-Organic Framework with Inserted Amides: Experimental and Theoretical Studies. *Chem. Commun.* **2012**, *48*, 3058–3060. <https://doi.org/10.1039/c2cc16231h>.
- (186) Alsmail, N. H.; Suyetin, M.; Yan, Y.; Cabot, R.; Krap, C. P.; Lü, J.; Easun, T. L.; Bichoutskaia, E.; Lewis, W.; Blake, A. J.; Schröder, M. Analysis of High and Selective Uptake of CO<sub>2</sub> in an Oxamide-Containing {Cu<sub>2</sub>(OOCR)<sub>4</sub>}<sup>-</sup>-Based Metal-Organic Framework. *Chem. - A Eur. J.* **2014**, *20*, 7317–7324. <https://doi.org/10.1002/chem.201304005>.
- (187) Yang, S.; Lin, X.; Lewis, W.; Suyetin, M.; Bichoutskaia, E.; Parker, J. E.; Tang, C. C.; Allan, D. R.; Rizkallah, P. J.; Hubberstey, P.; Champness, N. R.; Mark Thomas, K.; Blake, A. J.; Schröder, M. A Partially Interpenetrated Metal-Organic Framework for Selective Hysteretic Sorption of Carbon Dioxide. *Nat. Mater.* **2012**, *11*, 710–716. <https://doi.org/10.1038/nmat3343>.
- (188) Li, J. R.; Yu, J.; Lu, W.; Sun, L. B.; Sculley, J.; Balbuena, P. B.; Zhou, H. C. Porous Materials with Pre-Designed Single-Molecule Traps for CO<sub>2</sub> Selective Adsorption. *Nat. Commun.* **2013**, *4*, 1–8. <https://doi.org/10.1038/ncomms2552>.
- (189) Park, J.; Yuan, D.; Pham, K. T.; Li, J. R.; Yakovenko, A.; Zhou, H. C. Reversible Alteration of CO<sub>2</sub> Adsorption upon Photochemical or Thermal Treatment in a Metal-Organic Framework. *J. Am. Chem. Soc.* **2012**, *134*, 99–102. <https://doi.org/10.1021/ja209197f>.
- (190) Lv, D.; Shi, R.; Chen, Y.; Chen, Y.; Wu, H.; Zhou, X.; Xi, H.; Li, Z.; Xia, Q. Selective Adsorptive Separation of CO<sub>2</sub>/CH<sub>4</sub> and CO<sub>2</sub>/N<sub>2</sub> by a Water Resistant Zirconium-Porphyrin Metal-Organic Framework. *Ind. Eng. Chem. Res.* **2018**, *57*, 12215–12224. <https://doi.org/10.1021/acs.iecr.8b02596>.

- (191) Navarro, J. A. R.; Barea, E.; Salas, J. M.; Masciocchi, N.; Galli, S.; Sironi, A.; Ania, C. O.; Parra, J. B. Borderline Microporous-Ultramicroporous Palladium(II) Coordination Polymer Networks. Effect of Pore Functionalisation on Gas Adsorption Properties. *J. Mater. Chem.* **2007**, *17*, 1939–1946. <https://doi.org/10.1039/b617698d>.
- (192) Miller, S. R.; Wright, P. A.; Devic, T.; Serre, C.; Férey, G.; Llewellyn, P. L.; Denoyel, R.; Gaberova, L.; Filinchuk, Y. Single Crystal X-Ray Diffraction Studies of Carbon Dioxide and Fuel-Related Gases Adsorbed on the Small Pore Scandium Terephthalate Metal Organic Framework, Sc<sub>2</sub>(O<sub>2</sub>CC<sub>6</sub>H<sub>4</sub>CO<sub>2</sub>)<sub>3</sub>. *Langmuir* **2009**, *25*, 3618–3626.
- (193) Carrington, E. J.; McAnally, C. A.; Fletcher, A. J.; Thompson, S. P.; Warren, M.; Brammer, L. Solvent-Switchable Continuous-Breathing Behaviour in a Diamondoid Metal-Organic Framework and Its Influence on CO<sub>2</sub> versus CH<sub>4</sub> Selectivity. *Nat. Chem.* **2017**, *9*, 882–889. <https://doi.org/10.1038/nchem.2747>.
- (194) Suh, M. P.; Cheon, Y. E.; Lee, E. Y. Reversible Transformation of ZnII Coordination Geometry in a Single Crystal of Porous Metal-Organic Framework [Zn<sub>3</sub>(Ntb)<sub>2</sub>(EtOH)<sub>2</sub>·4EtOH. *Chem. - A Eur. J.* **2007**, *13*, 4208–4215. <https://doi.org/10.1002/chem.200601534>.
- (195) Park, H. J.; Suh, M. P. Mixed-Ligand Metal-Organic Frameworks with Large Pores: Gas Sorption Properties and Single-Crystal-to-Single-Crystal Transformation on Guest Exchange. *Chem. - A Eur. J.* **2008**, *14*, 8812–8821. <https://doi.org/10.1002/chem.200801064>.
- (196) Park, H. J.; Suh, M. P. Stepwise and Hysteretic Sorption of N<sub>2</sub>, O<sub>2</sub>, CO<sub>2</sub>, and H<sub>2</sub> Gases in a Porous Metal-Organic Framework [Zn<sub>2</sub>(BPnDC)<sub>2</sub>(Bpy)]. *Chem. Commun.* **2010**, *46*, 610–612. <https://doi.org/10.1039/b913067e>.
- (197) Cheon, Y. E.; Suh, M. P. Selective Gas Adsorption in a Microporous Metal-Organic Framework Constructed of CoII<sub>4</sub> Clusters. *Chem. Commun.* **2009**, 2296–2298. <https://doi.org/10.1039/b900085b>.
- (198) Choi, H. S.; Suh, M. P. Highly Selective CO<sub>2</sub> Capture in Flexible 3d Coordination Polymer Networks. *Angew. Chemie - Int. Ed.* **2009**, *48*, 6865–6869. <https://doi.org/10.1002/anie.200902836>.
- (199) Yao, Q.; Su, J.; Cheung, O.; Liu, Q.; Hedin, N.; Zou, X. Interpenetrated Metal-Organic Frameworks and Their Uptake of CO<sub>2</sub> at Relatively Low Pressures. *J. Mater. Chem.* **2012**, *22*, 10345–10351. <https://doi.org/10.1039/c2jm15933c>.
- (200) Zhang, G.; Wei, G.; Liu, Z.; Oliver, S. R. J.; Fei, H. A Robust Sulfonate-Based Metal-Organic Framework with Permanent Porosity for Efficient CO<sub>2</sub> Capture and Conversion. *Chem. Mater.* **2016**, *28*, 6276–6281. <https://doi.org/10.1021/acs.chemmater.6b02511>.
- (201) Safarifard, V.; Rodríguez-Hermida, S.; Guillerm, V.; Imaz, I.; Bigdeli, M.; Tehrani, A. A.; Juanhuix, J.; Morsali, A.; Casco, M. E.; Silvestre-Albero, J.; Ramos-Fernandez, E. V.; Maspoch, D. Influence of the Amide Groups in the CO<sub>2</sub>/N<sub>2</sub> Selectivity of a Series of Isostructural, Interpenetrated Metal-Organic Frameworks. *Cryst. Growth Des.* **2016**, *16*, 6016–6023. <https://doi.org/10.1021/acs.cgd.6b01054>.
- (202) Li, L.; Tang, S.; Wang, C.; Lv, X.; Jiang, M.; Wu, H.; Zhao, X. High Gas Storage Capacities and Stepwise Adsorption in a UiO Type Metal-Organic

Framework Incorporating Lewis Basic Bipyridyl Sites. *Chem. Commun.* **2014**, *50*, 2304–2307. <https://doi.org/10.1039/c3cc48275h>.

- (203) Yazaydin, A. Ö.; Snurr, R. Q.; Park, T. H.; Koh, K.; Liu, J.; LeVan, M. D.; Benin, A. I.; Jakubczak, P.; Lanuza, M.; Galloway, D. B.; Low, J. J.; Willis, R. R. Screening of Metal-Organic Frameworks for Carbon Dioxide Capture from Flue Gas Using a Combined Experimental and Modeling Approach. *J. Am. Chem. Soc.* **2009**, *131*, 18198–18199. <https://doi.org/10.1021/ja9057234>.
- (204) Mu, B.; Schoenecker, P. M.; Walton, K. S. Gas Adsorption Study on Mesoporous Metal-Organic Framework UMCM-1. *J. Phys. Chem. C* **2010**, *114*, 6464–6471.
- (205) Arstad, B.; Fjellvåg, H.; Kongshaug, K. O.; Swang, O.; Blom, R. Amine Functionalised Metal Organic Frameworks (MOFs) as Adsorbents for Carbon Dioxide. *Adsorption* **2008**, *14*, 755–762. <https://doi.org/10.1007/s10450-008-9137-6>.
- (206) Jiang, Z. R.; Wang, H.; Hu, Y.; Lu, J.; Jiang, H. L. Polar Group and Defect Engineering in a Metal-Organic Framework: Synergistic Promotion of Carbon Dioxide Sorption and Conversion. *ChemSusChem* **2015**, *8*, 878–885. <https://doi.org/10.1002/cssc.201403230>.
- (207) Chen, Z.; Xiang, S.; Arman, H. D.; Mondal, J. U.; Li, P.; Zhao, D.; Chen, B. Three-Dimensional Pillar-Layered Copper(II) Metal-Organic Framework with Immobilized Functional OH Groups on Pore Surfaces for Highly Selective CO<sub>2</sub>/CH<sub>4</sub> and C<sub>2</sub>H<sub>2</sub>/CH<sub>4</sub> Gas Sorption at Room Temperature. *Inorg. Chem.* **2011**, *50*, 3442–3446. <https://doi.org/10.1021/ic102347b>.
- (208) Chen, Z.; Xiang, S.; Arman, H. D.; Li, P.; Zhao, D.; Chen, B. Significantly Enhanced CO<sub>2</sub>/CH<sub>4</sub> Separation Selectivity within a 3D Prototype Metal-Organic Framework Functionalized with OH Groups on Pore Surfaces at Room Temperature. *Eur. J. Inorg. Chem.* **2011**, 2227–2231. <https://doi.org/10.1002/ejic.201100034>.
- (209) He, Y.; Zhang, Z.; Xiang, S.; Fronczek, F. R.; Krishna, R.; Chen, B. A Microporous Metal-Organic Framework for Highly Selective Separation of Acetylene, Ethylene, and Ethane from Methane at Room Temperature. *Chem. - A Eur. J.* **2012**, *18*, 613–619. <https://doi.org/10.1002/chem.201102734>.
- (210) Mulfort, K. L.; Farha, O. K.; Malliakas, C. D.; Kanatzidis, M. G.; Hupp, J. T. An Interpenetrated Framework Material with Hysteretic CO<sub>2</sub> Uptake. *Chem. - A Eur. J.* **2010**, *16*, 276–281. <https://doi.org/10.1002/chem.200902104>.
- (211) Banerjee, R.; Furukawa, H.; Britt, D.; Knobler, C.; O’Keeffe, M.; Yaghi, O. M. Control of Pore Size and Functionality in Isoreticular Zeolitic Imidazolate Frameworks and Their Carbon Dioxide Selective Capture Properties. *J. Am. Chem. Soc.* **2009**, *131*, 3875–3877. <https://doi.org/10.1021/ja809459e>.
- (212) Morris, W.; Leung, B.; Furukawa, H.; Yaghi, O. K.; He, N.; Hayashi, H.; Houndonougbo, Y.; Asta, M.; Laird, B. B.; Yaghi, O. M. A Combined Experimental-Computational Investigation of Carbon Dioxide Capture in a Series of Isoreticular Zeolitic Imidazolate Frameworks. *J. Am. Chem. Soc.* **2010**, *132*, 11006–11008. <https://doi.org/10.1021/ja104035j>.
- (213) Song, C.; He, Y.; Li, B.; Ling, Y.; Wang, H.; Feng, Y.; Krishna, R.; Chen, B. Enhanced CO<sub>2</sub> Sorption and Selectivity by Functionalization of a NbO-Type

- Metal-Organic Framework with Polarized Benzothiadiazole Moieties. *Chem. Commun.* **2014**, *50*, 12105–12108. <https://doi.org/10.1039/c4cc05833j>.
- (214) Song, C.; Hu, J.; Ling, Y.; Feng, Y.; Krishna, R.; Chen, D.; He, Y. The Accessibility of Nitrogen Sites Makes a Difference in Selective CO<sub>2</sub> Adsorption of a Family of Isostructural Metal–Organic Frameworks. *J. Mater. Chem. A* **2015**, *3*, 19417–19426.
- (215) Zhao, Y.; Wu, H.; Emge, T. J.; Gong, Q.; Nijem, N.; Chabal, Y. J.; Kong, L.; Langreth, D. C.; Liu, H.; Zeng, H.; Li, J. Enhancing Gas Adsorption and Separation Capacity through Ligand Functionalization of Microporous Metal–Organic Framework Structures. *Chem. - A Eur. J.* **2011**, *17*, 5101–5109. <https://doi.org/10.1002/chem.201002818>.
- (216) Mosca, N.; Vismara, R.; Fernandes, J. A.; Tuci, G.; Di Nicola, C.; Domasevitch, K. V.; Giacobbe, C.; Giambastiani, G.; Pettinari, C.; Aragoes-Anglada, M.; Moghadam, P. Z.; Fairen-Jimenez, D.; Rossin, A.; Galli, S. Nitro-Functionalized Bis(Pyrazolate) Metal–Organic Frameworks as Carbon Dioxide Capture Materials under Ambient Conditions. *Chem. - A Eur. J.* **2018**, *24*, 13170–13180. <https://doi.org/10.1002/chem.201802240>.
- (217) Li, J. R.; Tao, Y.; Yu, Q.; Bu, X. H.; Sakamoto, H.; Kitagawa, S. Selective Gas Adsorption and Unique Structural Topology of a Highly Stable Guest-Free Zeolite-Type MOF Material with N-Rich Chiral Open Channels. *Chem. - A Eur. J.* **2008**, *14*, 2771–2776. <https://doi.org/10.1002/chem.200701447>.
- (218) Henke, S.; Schneemann, A.; Wütscher, A.; Fischer, R. A. Directing the Breathing Behavior of Pillared-Layered Metal–Organic Frameworks via a Systematic Library of Functionalized Linkers Bearing Flexible Substituents. *J. Am. Chem. Soc.* **2012**, *134*, 9464–9474. <https://doi.org/10.1021/ja302991b>.
- (219) Mishra, P.; Mekala, S.; Dreisbach, F.; Mandal, B.; Gumma, S. Adsorption of CO<sub>2</sub>, CO, CH<sub>4</sub> and N<sub>2</sub> on a Zinc Based Metal Organic Framework. *Sep. Purif. Technol.* **2012**, *94*, 124–130. <https://doi.org/10.1016/j.seppur.2011.09.041>.
- (220) Henke, S.; Fischer, R. a. Gated Channels in a Honeycomb-like Zinc - Dicarboxylate - Bipyridine. *J. Am. Chem. Soc.* **2011**, *133*, 2064–2067.
- (221) Henke, S.; Schmid, R.; Grunwaldt, J. D.; Fischer, R. A. Flexibility and Sorption Selectivity in Rigid Metal–Organic Frameworks: The Impact of Ether-Functionalised Linkers. *Chem. - A Eur. J.* **2010**, *16*, 14296–14306. <https://doi.org/10.1002/chem.201002341>.
- (222) Zhang, J.; Wu, H.; Emge, T. J.; Li, J. A Flexible MMOF Exhibiting High Selectivity for CO<sub>2</sub> over N<sub>2</sub>, CH<sub>4</sub> and Other Small Gases. *Chem. Commun.* **2010**, *46*, 9152–9154. <https://doi.org/10.1039/c0cc02942d>.
- (223) Bae, Y. S.; Hauser, B. G.; Farha, O. K.; Hupp, J. T.; Snurr, R. Q. Enhancement of CO<sub>2</sub>/CH<sub>4</sub> Selectivity in Metal–Organic Frameworks Containing Lithium Cations. *Microporous Mesoporous Mater.* **2011**, *141*, 231–235. <https://doi.org/10.1016/j.micromeso.2010.10.048>.
- (224) Vaidhyanathan, R.; Iremonger, S. S.; Dawson, K. W.; Shimizu, G. K. H. An Amine-Functionalized Metal Organic Framework for Preferential CO<sub>2</sub> Adsorption at Low Pressures. *Chem. Commun.* **2009**, 5230–5232. <https://doi.org/10.1039/b911481e>.
- (225) Zhang, Z.; Xiang, S.; Rao, X.; Zheng, Q.; Fronczek, F. R.; Qian, G.; Chen, B. A Rod Packing Microporous Metal–Organic Framework with Open Metal

Sites for Selective Guest Sorption and Sensing of Nitrobenzene. *Chem. Commun.* **2010**, 46, 7205–7207. <https://doi.org/10.1039/c0cc01236j>.

- (226) Lee, C. H.; Huang, H. Y.; Liu, Y. H.; Luo, T. T.; Lee, G. H.; Peng, S. M.; Jiang, J. C.; Chao, I.; Lu, K. L. Cooperative Effect of Unsheltered Amide Groups on CO<sub>2</sub> Adsorption inside Open-Ended Channels of a Zinc(II)-Organic Framework. *Inorg. Chem.* **2013**, 52, 3962–3968. <https://doi.org/10.1021/ic302758g>.
